1 Spatio-temporal modelling for the evaluation of an altered Indian saline  
2 Ramsar site and its drivers for ecosystem management and restoration

3  
4

5 Rajashree Naik<sup>¶</sup> and L.K. Sharma<sup>¶\*</sup>

6

7 Department of Environmental Science, School of Earth Sciences, Central University of  
8 Rajasthan, Bandarsindri, Ajmer (Raj.) India

9

10 \*Corresponding author

11

12 E-mail: [laxmikant\\_evs@curaj.ac.in](mailto:laxmikant_evs@curaj.ac.in),

13

14 **Abstract**

15 Saline wetlands are keystone ecosystems in arid and semi-arid landscapes that are currently  
16 under severe threat. This study conducted spatio-temporal modelling of the largest saline Ramsar  
17 site of India, in Sambhar wetland from 1963-2059. One CORONA aerial photograph of 1963 and  
18 Landsat images of 1972, 1981, 1992, 2009, and 2019 were acquired and classified under 8 classes  
19 as Aravalli, barren land, saline soil, salt crust, saltpans, waterbody, settlement, and vegetation for  
20 spatial modelling integrated with bird census, soil-water parameters, GPS locations, and  
21 photographs. Past decadal area statistics state reduction of waterbody from 30.7 to 3.4% at constant  
22 rate (4.23%) to saline soil. Saline soil increased from 12.4 to 21.7% and saline soil converted to  
23 barren land from 45.4 to 49.6%; saltpans from 7.4 to 14% and settlement from increased 0.1 to  
24 1.3% till 2019. Future predictions hint at a net increase of 20% by wetland, vegetation by 30%,  
25 settlement by 40%, saltpan by 10%, barren land by 5%, and net loss of 20%, each by Aravalli and  
26 salt crust. The biggest loss of 120% was seen by saline soil converted to barren land. Notably, 40%  
27 of the current wetland will be lost by 2059. Additionally, soil-water parameters result state a loss  
28 of saline character of wetland ecosystem; subsequently bird statistics indicate a shift in migratory  
29 birds disturbing the wetland food web. India has been losing a critical habitat of migratory birds,

30 halophytes, and halophiles, along with livelihood. This study looks to bridge the missing link from  
31 local to global wetland ecological disconnect, providing thereby lake management and restoration  
32 strategies.

33

34 **Keywords:** Ecosystem, Encroachment, Lake, Modelling, Restoration, Saline wetland

## 35 **Introduction**

36 Due to human influences, freshwater shortage and water stress are argued to be linked [1].  
37 The anthropogenic alteration of natural resources has dramatically modified hydrological systems.  
38 [2]. Thus, considering anthropological influences, it is critical to conduct a systematic assessment  
39 of water resources in arid and semi-arid regions [3]. Saline lakes make up 44% and 23% of the  
40 volume and area of all lakes [4]. These occur mostly in arid and semi-arid regions as endorheic  
41 basins [5]. They have high ecological, economic, cultural, recreational, and scientific values [6].  
42 However, anthropogenic activities, especially salinization, water inflow diversions, construction  
43 of hydrological structures, pollution, mining, biological disruptions, exotic species invasion have  
44 already threatened these lakes [7] resulting in changes in hydro-patterns, water budget, and  
45 hydrological communications, habitat alteration, loss of productivity and connectivity among  
46 wetland complexes [8]. Saline lakes around the world are predicted to suffer from extended  
47 dryness, reduced hydroperiod, increased salinity, or complete desiccation by 2025 as already seen  
48 in Aral Sea, Lake Urmia, Owens Lake, Tarim Basin, Salton Sea [4]. These directly affected the  
49 billion-dollar global markets of shrimp, mineral industry, and ecologic disruption [4].

50 According to the Government of India (GoI), India ranks third in global salt market after  
51 China and USA contributing approximately 230 million tons exporting to 198 countries. Major  
52 importers are Bangladesh, Japan, Indonesia, South and North Korea, Qatar, Malaysia, U.A.E, and  
53 Vietnam. In India, 96% of salt is produced from Gujarat, Tamil Nadu, and Rajasthan with 76.7%,

54 11.16%, and 9.86% respectively from sea, lake, sub-soil brine, and rock salt deposits. Rajasthan  
55 state exports 22.678 million tonnes of salt worth 340.17 billion dollar to global market extracted  
56 from inland lake brine in Nawa, Kuchhaman, Rajas, Phalodi, Sujangarh, and Sambhar lake [9].  
57 This current study is in Sambhar Salt Lake (SSL), which is a gateway to the Thar Desert in India.  
58 It is the seventh Ramsar site of the country, designated on 23 March 1990, under criteria A with  
59 site No. 464 [10] and Important Bird Area No. IN073 [11]. Once it was a haven for 279 migratory  
60 and resident birds [12], which currently serves as a refuge for 31 migratory. Interestingly, despite  
61 its many years of corruption, it is not included in country's protected network. The greatest threat  
62 to this lake is illegal encroachment in the core area, which nearly destroyed the lake's identity [13].  
63 Many illegal tube wells have been drilled, and long pumps are used for groundwater over-  
64 extraction. Prior encroachment has turned it into a large capital-intensive corporate business. [14].  
65 It is hard to ignore illegal consequences even after repeated NGT intervention [15]. Importantly,  
66 SSL does require urgent restoration to its pristine condition.

67 Unfortunately, saline lakes in remote and inaccessible locations are little studied.  
68 Conventionally, numerous in-situ studies were conducted for saline lakes on phillipsite [16],  
69 chemical and biological properties [17], phytoplankton [18], primary productivity [19], stable  
70 isotopes [20], geochemistry [21]. In SSL, studies have been conducted for birds [22], halo-tolerant  
71 species identification by [23] and isolation [24], their characterization [25, 26]; on *Dunaliella sp.*  
72 [27] on lake formation [28]; on its limnological aspect [27]; on paleoclimatological conditions  
73 [26]; for sensor calibration and validation [29] and on extremophilic algal assessment [13]. These  
74 studies, however, are time-consuming, tedious, and expensive. Such research may not match fast-  
75 changing ecosystems.

76 Saline wetlands have dynamic hydro-periods [30]. These ecosystems usually experience  
77 Land Use Land Cover (LULC) modification seasonally [31]. So geospatial modelling is inevitable  
78 for these ecosystems. Popular models of contemporary literature are cellular-based and agent-  
79 based (or their hybrid) [32]. Cellular-based models consider both spatial and temporal components  
80 of LULC dynamics [33]. They are easy to standardize and competent to simulate wetland  
81 complexes [34]. These have been extensively used for past LULC trend analyses. However, future  
82 prediction enables the comprehension of sustainable management, restoration, combat  
83 desertification, biodiversity loss assessment and, water budgeting [35]. This research is conducted  
84 to complement the United Nations Decade on Ecosystem Restoration from 2021–2030 using aerial  
85 photograph of CORONA (1969), multispectral data sets, and ground information with Cellular  
86 Automata/Markov model to assess and predict the impact of salt pan encroachment under three-  
87 time frame as past (1969-2009), present (2019) and future (upto 2059).

## 88 **Material and methods**

### 89 **Study area**

90 SSL is in semi-arid climatic region of Rajasthan (Fig 1**Error! Reference source not**  
91 **found.**) with 26°52' to 27°02' N; 74°54' – 75°14' E running ENE–WSW direction in elliptical shape  
92 [11]. In 1961, the government acquired the region on a 99-year lease under the Ministry of  
93 Commerce and Industry [10]. SSL is 230 km<sup>2</sup> (22.5 km in length and 3-1 km in width) [23]. One  
94 of the world's oldest mountain range, Aravali surrounds it in the north, west, and south-east  
95 directions, extending up to 700 m [11]. Its maximum altitude is 360 m above mean sea level, with  
96 10 cm per km slope. Ephemeral streams (Mendha, Rupnagar, Khandel, Kharian) form the  
97 catchment of 5,520 km<sup>2</sup>. Mendha in fact is the largest feeder river that originates in the north from  
98 Sikar district and drains out in 3600 km<sup>2</sup>. Notably, it experiences tropical climate, and its soil

99 consists of silt and clay. Some part of the basin is calcareous, while most of it is argillaceous; it is  
100 rich in salts of sodium, potassium, calcium and magnesium cations and carbonate, bicarbonate,  
101 chloride, and sulfate anions. It appears white especially in areas with rich salt content; appears  
102 grey in areas with less salt content, and brown with no salt content [36]. Importantly, SSL at large,  
103 experiences distinct summer (March-June), rainy seasons (July-September), and winter (October-  
104 February). Overall, it receives around 500 mm of rainfall every year, while it enjoys 250-300  
105 sunny days [11]. Additionally, the average temperature is about 24.4 °C, going up to 40.7 °C in  
106 summer, and below 11 °C in winter [36]. Further, during rainy seasons, it looks like a muddy  
107 blackish wetland [25]. It has almost 3 m depth during monsoons, but shallows down to 60 cm  
108 during dry periods. Except for reservoir and saltpans, the whole lake dries up exposing salt flakes  
109 during summer [37]. A 5.16 km long dam divides into two unequal parts (77 km<sup>2</sup> towards east as  
110 reservoir and rest 113 km<sup>2</sup> is wetland) [26]. It receives migratory birds of Central Asian, East  
111 Asian, and East African flies. Invertebrates, amphibians, crustaceans come through rivers during  
112 monsoon when salinity is low [23]. Moreover, it provides shelter to 37 herbs (*Portulaca oleracea*,  
113 *Salsola foetida*, *Suaeda fruticosa*) 14 shrubs (*Salvadora oleoides*, *Salvadora persica*, *Sericotoma*  
114 *pauciflorum*) 14 trees (*Acacia nilotica*, *Acacia Senegal*, *Anogeissus pendula*) 15 grasses (*Apluda*  
115 *mutica*, *Aristida adscensionis*, *Cenchrus ciliaris*) 6 chlorophyceae (*Chamydomonas sp.*, *Duneliella*  
116 *salina*, *Oedogonium sp.*) 25 Cyanophyceae (*Lyngbya sp.*, *Merismopedia sp.*, *Microcoleus sp.*) and  
117 7 Bacillariophyceae (*Cymbella sp.*, *Melosira sp.*, *Navicula sp.*) species [38].

118 **Fig 1. Study area, (a) Indian saline Ramsar sites (b) SSL amid Nagaur, Jaipur and Ajmer.**

## 119 **Data processing**

120 We were interested in knowing the lake's status, especially in winter, when adequate  
121 surface water is expected and as mentioned earlier it naturally dries in summer. LULC

122 classification on a decadal scale was carried out for past, current, and future changes. Notably,  
123 only one aerial image of CORONA was obtained, which is well before the start of any satellite  
124 programmes. This photograph has only been digitized for visual interpretation of LULC classes;  
125 however, being a declassified image, we could not calculate the area. Satellite data including  
126 Landsat- MSS (Multispectral Scanner System) of 16 November 1972 and 18 October 1981,  
127 Landsat-5 Thematic Mapper (TM) of 25 November 1992 and 8 November 2009, and Landsat-8  
128 Operational Land Imager (OLI) of 20 January 2019 were also collected. Images of 1972 and 1981  
129 have 60m spatial resolution, while the rest of the images have 30m resolution. The best available  
130 cloud-free images of Landsat satellite were downloaded within this season. Additionally, the study  
131 was not impacted by droughts or floods. The study years, 1972, 1981, 1992 received rainfall above  
132 500 mm, while 2009 and 2019 received just about average rainfall [36]. The methodology followed  
133 has been shown in Fig 2.

#### 134 **Fig 2. Methodology flowchart.**

135 All of the downloaded images were geo-referenced and atmospherically and geometrically  
136 corrected. To maintain uniformity, the pan-sharpening of 1972 and 1981 images was done to 30m  
137 spatial resolution. Toposheet from Survey of India (1954) at 1:26,000 scale was used for boundary  
138 delineation. SSL was digitized and 3 km buffer was selected, as it is declared as an eco-sensitive  
139 zone, according to Rajasthan State Forest Department. For classification, pixel-based method was  
140 used using ERDAS Imagine, 2014, while the final maps were composed using Arc GIS 10.5.  
141 Further, SSL was divided into eight classes using supervised classification method; they include  
142 waterbody, saltpan, salt crust, vegetation, the Aravalli mountain range, saline soil, barren land, and  
143 settlement. The water bodies represent the wetland areas, which do not come under the reservoir.  
144 It appears dark-light blue in True Color Composite (TCC). Saltpans on the other hand, are the salt-

145 producing units; salt crust represents high salt deposition area, appearing white, while vegetation  
146 appears green, and are occupied by both xerophytes and halophytes, Aravalli represents the hill  
147 ranges, saline soil represents the terrestrial part of the lake with both soil and salt content appearing  
148 grey, barren land represents area without salt content appearing brown, while settlement represents  
149 built-up area surrounding SSL. Moreover, past change detection was conducted for 47 years (i.e.,  
150 1972-2019) on a decadal scale. Notably, LULC of each image was estimated using pixel-based  
151 classification. Supervised Maximum Likelihood classification method (MLC) was applied. 69  
152 GPS locations were obtained from in and around the lake during soil and water sample collections,  
153 bird census, and validation of classification shown in Fig 3.

### 154 **Fig. 3 Location of field points.**

155 Target locations were pre-defined for each class and sampling. Detailed field research were  
156 carried out on 13 February 2019 (winter); 10 April 2019 (summer); 30 June 2019 (monsoon), and  
157 6 January 2020. Additionally, out of 69 GPS locations, 48 points were used for classifications, and  
158 other points for accuracy assessment. Primary landmarks like historical sites (Shakambari temple,  
159 Devyani Sarovar, Dadu Dayal point, Sambhar City, Railway Station), along with birding sites,  
160 dumping sites, illegal pans, sewage points, tourist construction sites, salt processing, and  
161 packaging sites were identified (Fig 4 (a-f)) and historical photographs were collected from [38]  
162 as given in Fig 4 (g-h). The Google Earth was used for accuracy assessment of the past images.

163

164 **Fig 4. Field Photographs (a) & (b) construction sites, (c) & (d) surface wells, saltpans with**  
165 **illegal electrical cables (e) & (f) domestic pollution sources, and (g) & (h) historical**  
166 **photographs of lake and salt production.**

167

168 Dynamic degree was calculated using [40]

$$169 \quad K = \frac{U_b - U_a}{U_a} * \frac{1}{T} * 100 \% \quad (1)$$

170 K is the land use dynamic degree, calculated as percent LULC change per year, both  $U_a$   
171 and  $U_b$  represent areas under a specific annual LULC, while  $T$  represents the time in years.  
172 Dynamic matrix was generated between 1981-2019 to estimate LULC transfer. Notably, to  
173 quantify transition matrix thematically, equal number of classes are required. Classified image of  
174 1981 was taken instead of 1972 for matrix analysis, as SSL was subject to flash floods caused by  
175 1000 mm of rainfall in 1971. So, due to rising water levels, no salt crust was observed in the raw  
176 image. For future projection of four decades (i.e., from 2029-2059), Cellular Automata Markov  
177 Chain Model of Land Change modelling (LCM) was conducted using Terra Set software.  
178 Classified images of 1992, 2009, and 2019 (two decades representatives) were used for  
179 forecasting. The quantitative results were achieved using LCM, net change of each class was  
180 calculated and then the factors of change were calculated.

181 Moreover, to assess the current situation, three parameters (i.e., soil, water, and bird count)  
182 were chosen. Sixteen samples, each for soil and water were collected by stratified random sampling  
183 method. These collected samples were further analyzed in the laboratory of Department of  
184 Environmental Science as per American Public Health Associations (APHA) guidelines. pH and  
185 electrical conductivity were examined using respective electrode. Other parameters like salinity,  
186 chloride, carbonate, total organic carbon of soil and total dissolved solid, salinity, hardness,  
187 carbonate of samples was analyzed using titration method.

188 Bird censuses were conducted on 11-Jan-2019, and 6th and 7th January 2020. From the  
189 survey, 29 and 32 bird species with total of 1124 and 43,445 bird count were recorded in the  
190 respective years (Table 1). Good rainfall increased bird counts in 2019. 10 bird species like Black



191 Crowned Night Heron, Greater Flamingo, Lesser Flamingo, Gadwall, Little Ringed Plover,  
 192 Kentish Plover, Red Wattled Lapwing, Black Winged Stilt, Pier Avocet, and Common Sandpiper  
 193 have a strong preference for saline and alkaline lakes that attracts them to SSL. Importantly, some  
 194 species feeding upon invertebrates little Grebe, Graylag Goose, Bar-Headed Goose, Common  
 195 Teal, Northern Shoveler, Great Stone Plover, White-Tailed Lapwing, Black-Tailed Godwit,  
 196 Common Redshank, Curlew Sandpiper, Marsh Sandpiper, Wood Sandpiper, Little Stint,  
 197 Temmick’s Stint, Ruff, White Wagtail, Grey Wagtail, Pin-tailed Snipe, and Yellow wattled  
 198 Lapwing found in and around SSL. A species-wise detailed bird census conducted by [12] stated  
 199 that total 83 waterfowls were recorded. In 1994, 8,500 lesser flamingos were seen on the lake, but  
 200 no greater flamingoes were found; in 1995, 5,000 lesser flamingoes were recorded but no greater  
 201 flamingoes were observed, in 2001, 20,000 birds were observed out of which 10,000 were lesser  
 202 and 5,000 were greater flamingoes.

203 **Table 1.** Waterbirds counts and comparison.

| S No. | Common and scientific name                             | 2019 | 2020   |
|-------|--------------------------------------------------------|------|--------|
|       | Grebes                                                 |      |        |
| 1     | Little Grebe <i>Tachybaptus ruficollis</i>             | 9    | NF     |
|       | HERONS, EGRETS and BITTERNs:                           |      |        |
| 2     | Black-crowned Night Heron <i>Nycticorax nycticorax</i> | 3    | NF     |
| 3     | Indian Pond Heron <i>Ardeola grayii</i>                | NF   | 1      |
| 4     | Cattle Egret <i>Bubulcus ibis</i>                      | NF   | 5      |
|       | Flamingos:                                             |      |        |
| 5     | Greater Flamingo <i>Phoeniconaias</i>                  | 331  | 12,046 |
| 6     | Lesser Flamingo                                        | 128  | 24,413 |
|       | GEESE and DUCKS:                                       |      |        |
| 7     | Greylag Goose <i>Anser anser</i>                       | 6    | NF     |
| 8     | Barheaded Goose <i>A. indicus</i>                      | 18   | NF     |
| 9     | Common Pochard <i>Aythya ferina</i>                    | NF   | 3      |
| 10    | Gadwall <i>A. strepera</i>                             | 10   | NF     |
| 11    | Common Teal <i>A. crecca</i>                           | 9    | NF     |
| 12    | Northern Shoveler <i>A. clypeata</i>                   | 359  | 5,293  |
|       | GULLS, TERNS and SKIMMERS:                             |      |        |
| 13    | Brown-headed Gull <i>L. brunnicapillus</i>             | NF   | 1      |

|    |                                                       |      |        |
|----|-------------------------------------------------------|------|--------|
|    | Plovers:                                              |      |        |
| 14 | Great Stone Plover <i>Esacus recurvirostris</i>       | 1    | NF     |
| 15 | Little-ringed plover <i>C. dubius</i>                 | 4    | 25     |
| 16 | Pacific Golden Plover                                 | NF   | 1      |
| 17 | Kentish Plover <i>C. alexandrinus</i>                 | 4    | 47     |
| 18 | Red-wattled Lapwing <i>V. indicus</i>                 | 12   | 16     |
| 19 | White-tailed Lapwing <i>V. leucurus</i>               | 1    | 2      |
|    | Stilts, avocets:                                      |      |        |
| 20 | Black-winged Stilt <i>Himantopus himantopus</i>       | 16   | 112    |
| 21 | Pied Avocet <i>Recurvirostra avosetta</i>             | 34   | 422    |
|    | Snipes, curlews, sandpipers, shanks, godwits, stints: |      |        |
| 22 | Black-tailed Godwit <i>Limosa limosa</i>              | 2    | 2      |
| 23 | Eurasian Curlew <i>N. arquata</i>                     | NF   | 1      |
| 24 | Common Redshank <i>T. totanus</i>                     | 3    | 25     |
| 25 | Common Greenshank <i>T. nebularia</i>                 | NF   | 5      |
| 26 | Curlew Sandpiper <i>C. ferruginea</i>                 | 26   | NF     |
| 27 | Marsh Sandpiper <i>T. stagnatilis</i>                 | 1    | 2      |
| 28 | Green Sandpiper <i>T. ochropus</i>                    | NF   | 2      |
| 29 | Wood Sandpiper <i>T. glareola</i>                     | 5    | 7      |
| 30 | Common Sandpiper <i>Actitis hypoleucos</i>            | 2    | 15     |
| 31 | Little Stint <i>C. minuta</i>                         | 8    | 110    |
| 32 | Temminck's Stint <i>C. Temminckii</i>                 | 17   | 9      |
| 33 | Ruff <i>Philomachus pugnax</i>                        | 140  | 441    |
|    | Kingfishers:                                          |      |        |
| 34 | White-breasted Kingfisher <i>H. smyrnens</i>          | NF   | 3      |
|    | EAGLES, OSPREY, HARRIERS, FALCONS, KITES:             |      |        |
| 35 | Western Marsh-Harrier <i>Circus aeruginosus</i>       | NF   | 1      |
|    | WAGTAILS, PIPIT:                                      |      |        |
| 36 | White Wagtail <i>Motacilla alba</i>                   | 2    | 3      |
| 37 | White-browed Wagtail <i>M. maderaspatensis</i>        | NF   | 1      |
| 38 | Grey Wagtail <i>M. cinerea</i>                        | 1    |        |
|    | Additional species                                    |      |        |
| 39 | Pacific Golden Plover                                 | NF   | 1      |
| 40 | Raptor                                                | NF   | 3      |
| 41 | Crested Lark                                          | NF   | 5      |
| 42 | Greater Coual                                         | NF   | 1      |
| 43 | Pintailed Snipe                                       | 5    | NF     |
| 44 | Yellow lapwing                                        | 1    | NF     |
| 45 | Undefined                                             | NF   | 422    |
|    | Total count                                           | 1124 | 43,445 |
|    | Total species no.                                     | 29   | 32     |

## 204 **Results**

### 205 **Past 56 years**

206 Visual interpretation of CORONA revealed four geomorphic units (Aravalli hills, rivers,  
207 saline soil, and lake). Two major rivers were identified due to their shape, Mendha in north and  
208 Rupnagar in south with their rivulets. Bright tone and smooth textured landform is saline soil,  
209 which has reduced (Fig **Error! Reference source not found.**5). Importantly the image of 1972  
210 was classified at 80.95% accuracy with 0.73 Kappa coefficient, 1981 at 82.50 % with 0.76, 1992  
211 at 87.50 % with 0.82, 2009 at 85.71 % with 0.80 and 2019 at 87.50 % at 0.82. This accuracy is  
212 reflected in analysis of dynamic matrix.

#### 213 **Fig 5. LULC maps 1963, 1972, 1981, 1992, 2009 and 2019 of SSL.**

214 The study shows degraded trend of LULC for 47 years between 1972-2019 (Table 2, Fig  
215 6). In 1972, the waterbody was 159.6 km<sup>2</sup> (30%), saltpan was 38.3 km<sup>2</sup> (7.4%), salt crust was 0  
216 km<sup>2</sup> (0%), vegetation was 17.9 km<sup>2</sup> (3.4%), Aravalli was 3.5 km<sup>2</sup> (0.7%), saline soil was 64.3 km<sup>2</sup>  
217 (12.4%) and barren land was 236.0 km<sup>2</sup> (45.4%). In 1981, waterbody was 98.7 km<sup>2</sup> (19%), saltpan  
218 was 36.1 km<sup>2</sup> (6.9km<sup>2</sup>), salt crust was 34.4 km<sup>2</sup> (6.6%), vegetation as 87.6 km<sup>2</sup> (16.9%), Aravalli  
219 was 3.3 km<sup>2</sup> (0.6%), saline soil was 49.1 km<sup>2</sup> (9.4%), barren land was 209.6 km<sup>2</sup> (40.3%) and  
220 settlement was 1.1 km<sup>2</sup> (0.2%). In 1992, waterbody was 106.7 km<sup>2</sup> (20.5%), saltpan was 42.8 km<sup>2</sup>  
221 (8.2%), salt crust was 34.7 km<sup>2</sup> (6.7%), vegetation was 5.3 km<sup>2</sup> (1.0%), Aravalli was 3.3 km<sup>2</sup>  
222 (0.6%), saline soil was 90.7 km<sup>2</sup> (17.5%), barren land was 235.3 km<sup>2</sup> (45.2%) and settlement was  
223 1.1 km<sup>2</sup> (0.2%). In 2009, waterbody was 31.5 km<sup>2</sup> (6.1%), saltpan was 64.1 km<sup>2</sup> (12.3%), salt crust  
224 was 0.0 km<sup>2</sup> (0%), vegetation was 84.1 km<sup>2</sup> (16.2%), Aravalli was 3.2 km<sup>2</sup> (0.6%), saline soil was  
225 118.3 km<sup>2</sup> (27.7%), barren land was 217.3 km<sup>2</sup> (41.8%) and settlement was 1.4 km<sup>2</sup> (0.3%). In

226 2019, waterbody was 17.4 km<sup>2</sup> (3.4%), saltpan was 72.9 km<sup>2</sup> (14.0%), salt crust was 15.4 km<sup>2</sup>  
 227 (3.0), vegetation was 34.1 km<sup>2</sup> (6.6%), Aravalli was 3.2 km<sup>2</sup> (0.6%), saline soil was 112.6 km<sup>2</sup>  
 228 (21.7%), barren land was 257.8 km<sup>2</sup> (49.6%) and settlement was 6.5 km<sup>2</sup> (1.3%). Overall, the  
 229 change from 1972 to 2019 has been summarized, as waterbody decreased from 30.7 to 3.4%. Salt  
 230 crust increased from 0 to 3%. Vegetation increased from 3.4 to 6.6%. Aravalli decreased from 0.7  
 231 to 0.6%. Saline soil increased from 12.4 to 21.7%. Barren land increased from 45.4 to 49.6%.  
 232 Saltpan increased from 7.4 to 14%. Settlement increased from 0.1 to 1.3%.

233 **Fig 6. Trend of LULC change.**

234 **Table 2.** LULC change area from 1972-2019 (area in km<sup>2</sup>).

| LULC        | 1972  |      | 1981  |      | 1992  |      | 2009  |      | 2019  |      |
|-------------|-------|------|-------|------|-------|------|-------|------|-------|------|
|             | Area  | %    | Area  | %    | Area  | %    | Area  | %    | Area  | %    |
| Waterbody   | 159.6 | 30.7 | 98.7  | 19.0 | 106.7 | 20.5 | 31.5  | 6.1  | 17.4  | 3.4  |
| Saltpan     | 38.3  | 7.4  | 36.1  | 6.9  | 42.8  | 8.2  | 64.1  | 12.3 | 72.9  | 14.0 |
| Salt crust  | 0     | 0.0  | 34.4  | 6.6  | 34.7  | 6.7  | 0.0   | 0.0  | 15.4  | 3.0  |
| Vegetation  | 17.9  | 3.4  | 87.6  | 16.9 | 5.3   | 1.0  | 84.1  | 16.2 | 34.1  | 6.6  |
| Aravalli    | 3.5   | 0.7  | 3.3   | 0.6  | 3.3   | 0.6  | 3.2   | 0.6  | 3.2   | 0.6  |
| Saline soil | 64.3  | 12.4 | 49.1  | 9.4  | 90.7  | 17.5 | 118.3 | 22.7 | 112.6 | 21.7 |
| Barren land | 236.0 | 45.4 | 209.6 | 40.3 | 235.3 | 45.2 | 217.3 | 41.8 | 257.8 | 49.6 |
| Settlement  | 0.5   | 0.1  | 1.1   | 0.2  | 1.1   | 0.2  | 1.4   | 0.3  | 6.5   | 1.3  |

235 LULC change rate (Table 3) is represented as K (%). It shows the waterbody degrading at  
 236 the rate of -4.23%, 0.73%, -4.14%, and -4.47% since 1972-2019. In fact, in the first decade, K of  
 237 vegetation was 43.38% and settlement was 12.66%. Saltpan decreased by 0.63%, Aravalli by  
 238 0.56%, saline soil by 2.62%, and barren land by 1.24%. Furthermore, from 1981 to 1992, only  
 239 vegetation changed negatively; rest of the classes like increased wetland by 0.73%, saltpan by  
 240 1.68%, salt crust by 0.08%, Aravalli by 0.06%, saline soil by 7.71%, barren land by 1.11% and

241 settlement by 0.43%. From 1992 to 2009, wetland decreased by -4.14% followed by salt crust by  
 242 5.88%, Aravalli by 0.11%, and barren land by 0.45% whereas vegetation by 0.20%, and saline soil  
 243 by 1.78% positive K. From 2009 to 2019, wetland, vegetation, Aravalli, salt crust, and saline soil  
 244 showed negative K by 4.47%, 5.95%, 0.11%, 0.00%, and 0.48% respectively and saltpan, barren  
 245 land, and settlement showed positive K of 1.36%, 1.86%, and 37.98% respectively. Settlement has  
 246 high K value in this decade.

247 **Table 3. LULC dynamic degree K (percentage).**

| LULC classes | 1972-81 | 1981-92 | 1992-09 | 2009-19 |
|--------------|---------|---------|---------|---------|
| waterbody    | -4.23%  | 0.73%   | -4.14%  | -4.47%  |
| Saltpan      | -0.63%  | 1.68%   | 2.93%   | 1.36%   |
| Salt crust   | 0.00%   | 0.08%   | -5.88%  | 0.00%   |
| Vegetation   | 43.38%  | -8.54%  | 88.20%  | -5.95%  |
| Aravalli     | -0.56%  | 0.06%   | -0.11%  | -0.11%  |
| Saline soil  | -2.62%  | 7.71%   | 1.78%   | -0.48%  |
| Barren land  | -1.24%  | 1.11%   | -0.45%  | 1.86%   |
| Settlement   | 12.66%  | 0.43%   | 1.25%   | 37.98%  |

248 LULC transition matrix (Table 4) states conversion from wetland (75 km<sup>2</sup>) to saline soil,  
 249 second largest from barren land to (22.5 km<sup>2</sup>) to vegetation. 0.96 km<sup>2</sup> of Aravalli to barren land,  
 250 saline soil (21.67 km<sup>2</sup>) to barren land. 13.87 km<sup>2</sup> and 12.11 km<sup>2</sup> of salt crust is to saline soil and  
 251 barren land respectively.

252 **Table 4. LULC transition matrix from 1981-2019.**

| 1981        | 2019     |             |             |            |         |            |            |            |             |
|-------------|----------|-------------|-------------|------------|---------|------------|------------|------------|-------------|
|             | Aravalli | Barren land | Saline soil | Salt crust | Saltpan | Settlement | Vegetation | Water body | Grand Total |
| Aravalli    | 2.12     | 0.96        | 0.00        | 0.00       | 0.01    | 0.01       | 0.11       | 0.01       | 3.23        |
| Barren land | 1.02     | 155.46      | 3.54        | 1.04       | 21.26   | 3.25       | 22.57      | 0.55       | 208.69      |
| Saline soil | 0.00     | 21.67       | 17.86       | 2.96       | 4.47    | 0.04       | 1.97       | 0.10       | 49.08       |

|             |      |        |        |       |       |      |       |       |        |
|-------------|------|--------|--------|-------|-------|------|-------|-------|--------|
| Salt crust  | 0.00 | 12.11  | 13.87  | 4.33  | 2.99  | 0.10 | 0.95  | 0.08  | 34.43  |
| Saltpan     | 0.00 | 0.89   | 0.32   | 1.92  | 29.21 | 0.33 | 0.96  | 2.41  | 36.04  |
| Settlement  | 0.08 | 66.07  | 1.22   | 0.26  | 11.63 | 2.78 | 7.35  | 0.40  | 89.79  |
| Wetland     | 0.00 | 0.70   | 75.84  | 4.86  | 3.30  | 0.02 | 0.16  | 13.87 | 98.74  |
| Grand Total | 3.22 | 257.85 | 112.65 | 15.38 | 72.86 | 6.52 | 34.09 | 17.43 | 520.01 |

---

## 253 **Current status of SSL**

### 254 **Soil and water quality parameters**

255 Soil parameters like pH, Electrical Conductivity (EC), salinity, chloride, carbonate, and  
256 Total Organic Carbon (TOC) were analyzed and mapped (Fig 7). Linear correlation was  
257 calculated. Highest positive correlation was observed between salinity and EC ( $r = 0.99$ ),  
258 indicating salts as the major factors for conductivity. Anions like chloride, carbonates, and  
259 bicarbonates, chloride have very high EC ( $r = 0.99$ ), which infers that chlorides are major anions  
260 responsible for salinity. TOC is slightly positively related ( $r = 0.5$ ) to other parameters. Water  
261 parameters like pH, EC, TDS, salinity, chloride, carbonate, and hardness were calculated and  
262 mapped (Fig 8). Linear correlation was calculated. Highest positive correlation was observed  
263 between salinity and EC ( $r = 0.93$ ) and the same positive relationship between salinity and TDS. As  
264 per the analysis, major salinity has been contributed by chloride ions; it also shows positive  
265 correlation between EC and TDS. Other than chloride, carbonate has also correlation with TDS  
266 ( $r = 0.5$ ).

267 **Fig 7. Mapping soil quality parameters.**

268 **Fig 8. Mapping water quality parameters.**

### 269 **Future LULC for next 40 years**

270 Future prediction was conducted. Predicted maps of 2029, 20239, 2049, and 2059 were  
271 obtained (Fig 9). Waterbody has been interchangeably used with wetland class name. There will

272 be decrease in wetland area and increases of saltpans towards north. Conversion of saline soil into  
273 barren land in central part is observed. Towards south, saltpans will have no noticeable change  
274 until 2039, however, will increase in 2049 and 2059 maps. Area statistics graphs for predicted  
275 maps were derived through modelling (Fig 9a-j). (a) shows percentage wise gain and loss; (b)  
276 shows net change in percentage and (c to j) shows class-wise contributions to net changes.

### 277 **Fig 9. Maps of future prediction.**

278 Fig 10 (a) shows highest gain in wetland by 60% and highest loss of saline soil by 70%. It  
279 shows wetland loss by 40%, vegetation gained 40% and loss 30%, settlement gained by 50% and  
280 loss by 20%, saltpan gain by 30% and loss by 20%, salt crust gain by 40%, and loss by 50%, saline  
281 soil gain by 40% and loss by 70%, barren land gain by 20% and loss by 10 % and Aravalli gain  
282 by 40% and loss by 20%. Fig 10 (b) shows net increase by 20% in wetland, 30% in vegetation,  
283 40% in settlement, 10% in saltpan, 5% in barren land, and decrease by 20% in salt crust, saline  
284 soil by 120%, and Aravalli by 20%. Fig 10 (c to j) shows net change in each LULC. Aravalli will  
285 positively impact by 0.01% and negatively by 0.02% and 0.04% by settlement and barren land.  
286 Positive contributions to net change of barren land by salt crust and saline soil is by 0.01% and 5%  
287 respectively, negatively in wetland by 0.01%, vegetation by 0.5%, settlement by 0.05%, and  
288 saltpan by 3%. Positive contributions to saline soil are by wetland and saltpan by 0.1% and 0.5%  
289 and negatively by 5% by barren land. Positive contribution in salt crust by 0.1% and negatively  
290 by vegetation and barren land by 0.2% and 0.24% respectively. Positive contributions to saltpan  
291 by barren land is by 2.79% and negatively by wetland, vegetation, and saline soil. Settlement  
292 would experience positively by vegetation, saltpan, barren land, and Aravalli by 0.18, 0.02, 0.34,  
293 and 0.1 % respectively and negatively by saline soil by 0.01 %. Vegetation will experience  
294 positively by saltpan by 0.8 % and barren land by 0.7 % and negatively by settlement by 0.21 %

295 and lastly wetland will experience positively by saltpan by 0.30 %, barren land by 0.10 % and  
296 negatively by saline soil by 0.25 %. Spatial cubic trend changes of SSL are given in (Fig 11).

297 **Fig 10. LULC change percentages: (a) gain and loss of LULC (b) net change between 2029**  
298 **and 2059 and (c-j) contributions of each class to net changes.**

299 **Fig 11. Spatial trend representation.**

## 300 **Discussion**

### 301 **Loss of saline character**

302 The topmost layer of SSL (0-115 cm) appears greyish brown to dark grey from top to  
303 bottom due to organic residues with minerals of Kieserite providing brine rich in carbonate, sulfate,  
304 calcium, magnesium, 115-360 cm appear dark grey with bloedite and brine rich in sodium, 360-  
305 600 cm is rich in calcite, polyhalite, gypsum, dolomite and brine rich in same constituents besides  
306 potassium, 600-1900 cm has weathered gypsum, calcite, dolomite, polyhalite, thenardite with no  
307 brine and below 1900 cm has pre-Cambrian rock basement consisting of schists, phyllites and  
308 quartzite [10]. However, the decadal analysis states that the six vertical soil gradients are at stake.  
309 The only method approved by GoI is the collection of brine through pans and kyars [41]. 18,65,000  
310 tons/year of salt were sustainably extracted in which lake water provided  $18 \times 10^5$  tons/ year,  
311 rainwater  $5 \times 10^3$  tons/year, and river water  $6 \times 10^4$  tons/ year [11]. 2 000 illegal tube wells and 240  
312 bore wells have been built over the last two decades. [42] stealing brine worth 300 million USD  
313 [41] from both surface and sub-surface [10]. Results from the imagery of 1963 do not suggest that  
314 there were unauthorized pans. It occupied 7.4 % by authorized Sambhar Salt Ltd. in 1972.  
315 Gradually in 1992, 2009 and 2019 encroachment increased to 8.2, 12.3 to 14, 10 % respectively.  
316 Major encroachment appeared in Nagaur due to the construction of hydrological structures [43].  
317 Other threats are livestock ranching, poaching, sewage discharge, trails [36], vehicle testing [42].



## 318 **Loss of wetland connectivity and trophic structure**

319           Within the 3 km SSL buffer zone, Naliasar, Devyani sarovar, and Ratan talab are linked by  
320 birds for breeding, feeding, and roosting. Their connectivity depends on water budget,  
321 hydrophytes, hydric soil, predator status, food availability, hydro-period, wetland complexes,  
322 topography, geography, and weather [44]. However, the results of satellites show a steady decline  
323 at 4 % from 30.4 to 3.4 %. This has forced the bird to move elsewhere. Due to the shrinkage, its  
324 complex trophic structure with 39 aquatic and 80 terrestrial producers, 133 primary and secondary  
325 consumers [25], and 279 birds as tertiary consumers [12] are at stake. Depending on water  
326 availability, level, depth, and microbiota, wetland connectivity is divided into three types; include  
327 bottom-dwelling, surface, and shore animals for SSL [23]. Bottom and mud dwelling animals like  
328 *Polypodium sp.* and *Chironomus sp.* survive in favorable seasons from July to December, when  
329 salinity is 9.6 to 72.6 %, carbon dioxide is in between 48 to 56.2 mg/l, and oxygen is between 42  
330 to 27.8 mg/l [23]. Surface animals consist of both plankton and nekton. Phytoplanktons  
331 (*Dunaliella saline*, *Aphanotheca halophytica*, *Spirulina sp*) and zooplanktons protozoans, nauplii  
332 of crustaceans [23], and nektons are stenohaline that survive during the favorable condition, and  
333 replaced by euryhaline animals (*Artemia salina*, *Ephydra macellaria*, and *Eristalis sp.*) during  
334 adverse conditions, tolerating up to 164 % salinity, and disappear in May to June, when lake is  
335 naturally dry. Shore animals represented by *Labidura riparia*, *Coniocleonus sp.* and others survive  
336 during favorable periods; however, they travel to the core during adverse conditions. However,  
337 these species might not be available as the lake is shrinking.

## 338 **Management and Restoration potentials**

339           When saline lakes are relentlessly desiccated, they might become dust bowl harmful for  
340 both man and environment as in case of Owens Lake in California or collapse billion-dollar global

341 market of brine shrimp as in case of Lake Urmia or loss of 40,000 metric tons of fishery and 60,000  
342 jobs in Aral Sea [45]. Shriveled saline lakes create ecological disconnectivity, neither support  
343 unique halophytes and halophytes nor attract flamingoes or other birds [46]. So, this is the high  
344 time when Sambhar lake requires urgent attention, least it might also require more capital for  
345 restoration than it generated revenue as in the case of Owen's lake when US\$ 3.6 billion was spent  
346 for its dust mitigation [47]. At current stage, it is possible through the reconstruction of its  
347 physicochemical adjustments, and reintroduction of native flora and fauna. Emphasis on health  
348 protection, incentives, and rewards be given to salt workers so that more people participate in wise  
349 use of this lake. Demolishing check dams and anicuts, ban of sub-surface brine collection, using  
350 electrical pumps, illegal salt pan encroachment in and around lake be declared as a punishable act,  
351 demolish construction up to 3km buffer zone declaring it 'no construction zone', controlled sewage  
352 disposal, increasing water residence period. Increasing aquatic biodiversity, hydrodynamics,  
353 nutrient cycling, vegetative and non- vegetative productivity, cascading trophic levels be focused.  
354 These steps will not only help SSL to its pristine conditions but also generate revenue for a longer  
355 period, provide jobs to more people and attract more migratory birds.

## 356 **Conclusion**

357 This work emphasizes the understanding of spatio-temporal variation of the largest inland  
358 saline Ramsar site in semi-arid region of India over 9 decades. Past LULC trends indicated its  
359 continuous shrinkage. This study further confirmed the current situation through field visits, soil-  
360 water parameters analysis, bird census information. We modelled its future predictions using the  
361 CA-Markov model using geospatial platform until 2059. It indicated complete desiccation of the  
362 wetland to a wasteland. This lake will neither be able to generate billion dollars revenue, nor attract  
363 lakhs of migratory birds or provide jobs to thousands of salt workers. The major influencing factors

364 are illegal saltpan-encroachment, excess groundwater extraction, increasing settlement area, and  
365 water diversion. Our study suggests that its restoration is very much essential to revive its  
366 hydrological configurations. Further, we have also suggested some restoration strategies that could  
367 be practically implemented.

## 368 **Author contributions**

369 Both the authors contributed to the study conception, design, and data collection. Methodology  
370 was conceptualized by Sharma.L and was performed by Naik.R. The first draft of the manuscript  
371 was written by Naik.R. Sharma.L provided editorial comments. Both the authors read and  
372 approved the final manuscript.

## 373 **Disclosure of Funding Sources**

374 No funding has been received

## 375 **Conflict of interest**

376 The authors certify that there are no conflicts of interest to disclose.

## 377 **References**

- 378 1. Sokolik IN, Shiklomanov AI, Xi X, de Beurs KM, Tatarskii VV. Quantifying the  
379 anthropogenic signature in drylands of Central Asia and its impact on water scarcity and  
380 dust emissions. In *Landscape Dynamics of Drylands across Greater Central Asia: People,  
381 Societies and Ecosystems 2020* (pp. 49-69). Springer, Cham.
- 382 2. Scholes RJ. The Future of Semi-Arid Regions: A Weak Fabric Unravels. *Climate*. 2020  
383 Mar;8(3):43.
- 384 3. Garmaev EZ, Ayurzhanayev AA, Tsydyypov BZ, Alymbaeva ZB, Sodnomov BV, Andreev  
385 SG, Zharnikova MA, Batomunkuev VS, Mandakh N, Salikhov TK, Tulokhonov AK.

- 386           Assessment of the Spatial and Temporal Variability of Arid Ecosystems in the Republic of  
387           Buryatia. *Arid Ecosystems*. 2020 Apr;10:114-22.
- 388           4. Wurtsbaugh WA, Miller C, Null SE, DeRose RJ, Wilcock P, Hahnenberger M, Howe F,  
389           Moore J. Decline of the world's saline lakes. *Nature Geoscience*. 2017 Nov;10(11):816-21.
- 390           5. Pedler RD, Ribot RF, Bennett AT. Long-distance flights and high-risk breeding by  
391           nomadic waterbirds on desert salt lakes. *Conservation biology*. 2018 Feb 1;32(1):216-28.
- 392           6. Williams WD. Conservation of salt lakes. *Hydrobiologia*. 1993 Sep;267(1):291-306.
- 393           7. Meng Q. Climate change and extreme weather drive the declines of saline lakes: a  
394           showcase of the Great Salt Lake. *Climate*. 2019 Feb;7(2):19.
- 395           8. Cañedo-Argüelles M, Kefford B, Schäfer R. Salt in freshwaters: causes, effects and  
396           prospects-introduction to the theme issue.
- 397           9. SCI; [http://saltcomindia.gov.in/industry\\_india.html?tp=Salt](http://saltcomindia.gov.in/industry_india.html?tp=Salt) Accessed on 17 February  
398           2021
- 399           10. Singh BP, Neha S, Singh SP. Modern salt (halite) deposits of the Sambhar Lake, Rajasthan  
400           and their formative conditions. *Current Science*. 2013;104(11):1482-4.
- 401           11. Yadav AK, Vardhan S, Kashyap S, Yandigeri M, Arora DK. Actinomycetes diversity  
402           among rRNA gene clones and cellular isolates from Sambhar salt lake, India. *The Scientific*  
403           *World Journal*. 2013 Jan 1;2013.
- 404           12. Sangha HS. The birds of Sambhar Lake and its environs. *Indian Birds*. 2008;4(3):82-97.
- 405           13. Vijay R, Pinto SM, Kushwaha VK, Pal S, Nandy T. A multi-temporal analysis for change  
406           assessment and estimation of algal bloom in Sambhar Lake, Rajasthan, India.  
407           *Environmental monitoring and assessment*. 2016 Sep;188(9):1-0.

- 408 14. DtE [Down to Earth] <https://www.downtoearth.org.in/news/choked-on-salt-41030>  
409 [Accessed on 15 June 2019a](#)
- 410 15. ToI [Times of India] [https://timesofindia.indiatimes.com/home/environment/Cancel-](https://timesofindia.indiatimes.com/home/environment/Cancel-illegal-salt-pans-in-Sambhar-Lake-NGT-bench-to-Raj-govt/articleshow/55927883.cms)  
411 [illegal-salt-pans-in-Sambhar-Lake-NGT-bench-to-Raj-govt/articleshow/55927883.cms](#)  
412 [Accessed on 15 June 2019](#)
- 413 16. Hay RL. Phillipsite of saline lakes and soils. *American Mineralogist: Journal of Earth and*  
414 *Planetary Materials*. 1964 Oct 1;49(9-10):1366-87.
- 415 17. Bayly IA, Williams WD. Chemical and biological studies on some saline lakes of south-  
416 east Australia. *Marine and Freshwater Research*. 1966;17(2):177-228.
- 417 18. Baltanás A, Montes C, Martino P. Distribution patterns of ostracods in Iberian saline lakes.  
418 Influence of ecological factors. In *Saline Lakes 1990* (pp. 207-220). Springer, Dordrecht.
- 419 19. Hammer, U. T. (1981). Primary production in saline lakes. *Salt lakes*, 47-57.
- 420 20. Gat JR. Stable isotopes of fresh and saline lakes. In *Physics and chemistry of lakes 1995*  
421 (pp. 139-165). Springer, Berlin, Heidelberg.
- 422 21. Jones BF, Deocampo DM. Geochemistry of saline lakes. *Treatise on geochemistry*. 2003  
423 Dec;5:605.
- 424 22. Adam RM. Notes on the birds of the Sambhar Lake and its vicinity. *Stray Feathers*.  
425 1873;1(5):361-404.
- 426 23. Baid IC. Description of a new species of *Branchinella sayce* from sambhar lake, India  
427 (*crustacea-branchiopoda-anostraca*).
- 428 24. Kalambe GN, Upasani VN. Isolation and Identification of Haloalkaliphilic Archaeal  
429 Isolates from a Soda Lake in India.

- 430 25. Gupta M, Aggarwal S, Navani NK, Choudhury B. Isolation and characterization of a  
431 protease-producing novel haloalkaliphilic bacterium *Halobiforma* sp. strain BNMIITR  
432 from Sambhar lake in Rajasthan, India. *Annals of Microbiology*. 2015 Jun;65(2):677-86.
- 433 26. Gaur A. Isolation and Characterization of Halotolerant *Bacillus* sp with extra Cellular A-  
434 Amylase production Potential from Sambhar salt lake, India.
- 435 27. Pathak AP, Cherekar MN. Hydrobiology of hypersaline Sambhar salt lake a Ramsar site,  
436 Rajasthan, India.
- 437 28. Cherekar MN, Pathak AP. Chemical assessment of Sambhar Soda lake, a Ramsar site in  
438 India. *Journal of Water Chemistry and Technology*. 2016 Jul;38(4):244-7.
- 439 29. Lulla KP, Helfert MR. Analysis of seasonal characteristics of Sambhar Salt Lake, India,  
440 from digitized Space Shuttle photography. *Geocarto International*. 1989 Mar 1;4(1):69-74.
- 441 30. Wang G, Lv J, Han G, Zhu S, Liu X, Wang A, Guan B, Zhao Y. Ecological Restoration of  
442 Degraded Supratidal Wetland Based on Microtopography Modification: a Case Study in  
443 the Yellow River Delta. *Wetlands*. 2020 Sep 4:1-1.
- 444 31. Gounaridis D, Chorianopoulos I, Symeonakis E, Koukoulas S. A Random Forest-Cellular  
445 Automata modelling approach to explore future land use/cover change in Attica (Greece),  
446 under different socio-economic realities and scales. *Science of the Total Environment*.  
447 2019 Jan 1;646:320-35.
- 448 32. Li X, Yeh AG. Cellular automata modelling for urban planning in fast-growth regions. In  
449 *Handbook of Planning Support Science* 2020 Feb 18. Edward Elgar Publishing.
- 450 33. Munthali MG, Mustak S, Adeola A, Botai J, Singh SK, Davis N. Modelling land use and  
451 land cover dynamics of Dedza district of Malawi using hybrid Cellular Automata and

- 452 Markov model. Remote Sensing Applications: Society and Environment. 2020 Jan  
453 1;17:100276.
- 454 34. Cao M, Zhu Y, Quan J, Zhou S, Lü G, Chen M, Huang M. Spatial sequential modeling and  
455 predication of global land use and land cover changes by integrating a global change  
456 assessment model and cellular automata. Earth's Future. 2019 Sep;7(9):1102-16.
- 457 35. Cuaresma JC, Fengler W, Kharas H, Bekhtiar K, Brottrager M, Hofer M. Will the  
458 Sustainable Development Goals be fulfilled? Assessing present and future global poverty.  
459 Palgrave Communications. 2018 Mar 20;4(1):1-8.
- 460 36. Kumar S (2005) Fauna of Sambhar Lake (Rajasthan). Wetland Ecosystem Series 6: 1-200.
- 461 37. Sanadhya S, Nagarajappa R, Sharda AJ, Asawa K, Tak M, Batra M, Daryani H. The oral  
462 health status and the treatment needs of salt workers at Sambhar Lake, Jaipur, India. Journal  
463 of clinical and diagnostic research: JCDR. 2013 Aug;7(8):1782.
- 464 38. Charan PD, Sharma KC. Floral diversity of Thar Desert of western Rajasthan, India. J.  
465 Phytol. Res. 2016;29(1):55-71.
- 466 39. [Scroll \[https://scroll.in/article/918040/mayalee-the-story-of-an-indian-dancing-girl-who-\]\(https://scroll.in/article/918040/mayalee-the-story-of-an-indian-dancing-girl-who\)](https://scroll.in/article/918040/mayalee-the-story-of-an-indian-dancing-girl-who)  
467 [stood-up-to-the-british-raj](https://scroll.in/article/918040/mayalee-the-story-of-an-indian-dancing-girl-who). Accessed on 15 June 2019
- 468 40. Nath B, Niu Z, Singh RP. Land Use and Land Cover changes, and environment and risk  
469 evaluation of Dujiangyan city (SW China) using remote sensing and GIS techniques.  
470 Sustainability. 2018 Dec;10(12):4631.
- 471 41. Shukal DW, Rahaman AA. Sambhar Lake a Wetland—An Assessment. InProc. Of the 1st  
472 International conference on the Ecological Importance of Solar Saltworks (CEISSA 06)  
473 Santorini Island, Greece 2006.

- 474 42. DtE [Down to Earth] <https://www.downtoearth.org.in/coverage/environment/solar-threat->  
475 [to-Sambhar-44371](#) Accessed on 15 June 2019b
- 476 43. Bhat AH, Sharma KC, Banday UJ. Impact of Climatic Variability on Salt Production in  
477 Sambhar Lake, a Ramsar Wetland of Rajasthan, India. Middle-East Journal of Scientific  
478 Research. 2015;23(9):2060-5.
- 479 44. Ma Z, Cai Y, Li B, Chen J. Managing wetland habitats for waterbirds: an international  
480 perspective. Wetlands. 2010 Feb 1;30(1):15-27.
- 481 45. Crighton EJ, Barwin L, Small I, Upshur R. What have we learned? A review of the  
482 literature on children's health and the environment in the Aral Sea area. International  
483 Journal of Public Health. 2011 Apr;56(2):125-38.
- 484 46. Ryan E. The Public Trust Doctrine, Private Water Allocation, and Mono Lake: The  
485 Historic Saga of National Audubon Society v. Superior Court. *Envtl. L.* 2015;45:561.
- 486 47. Kittle S. Survey of reported health effects of owens lake particulate matter. Great Basin  
487 Unified Air Pollution Control District. 2000 Jan 14.



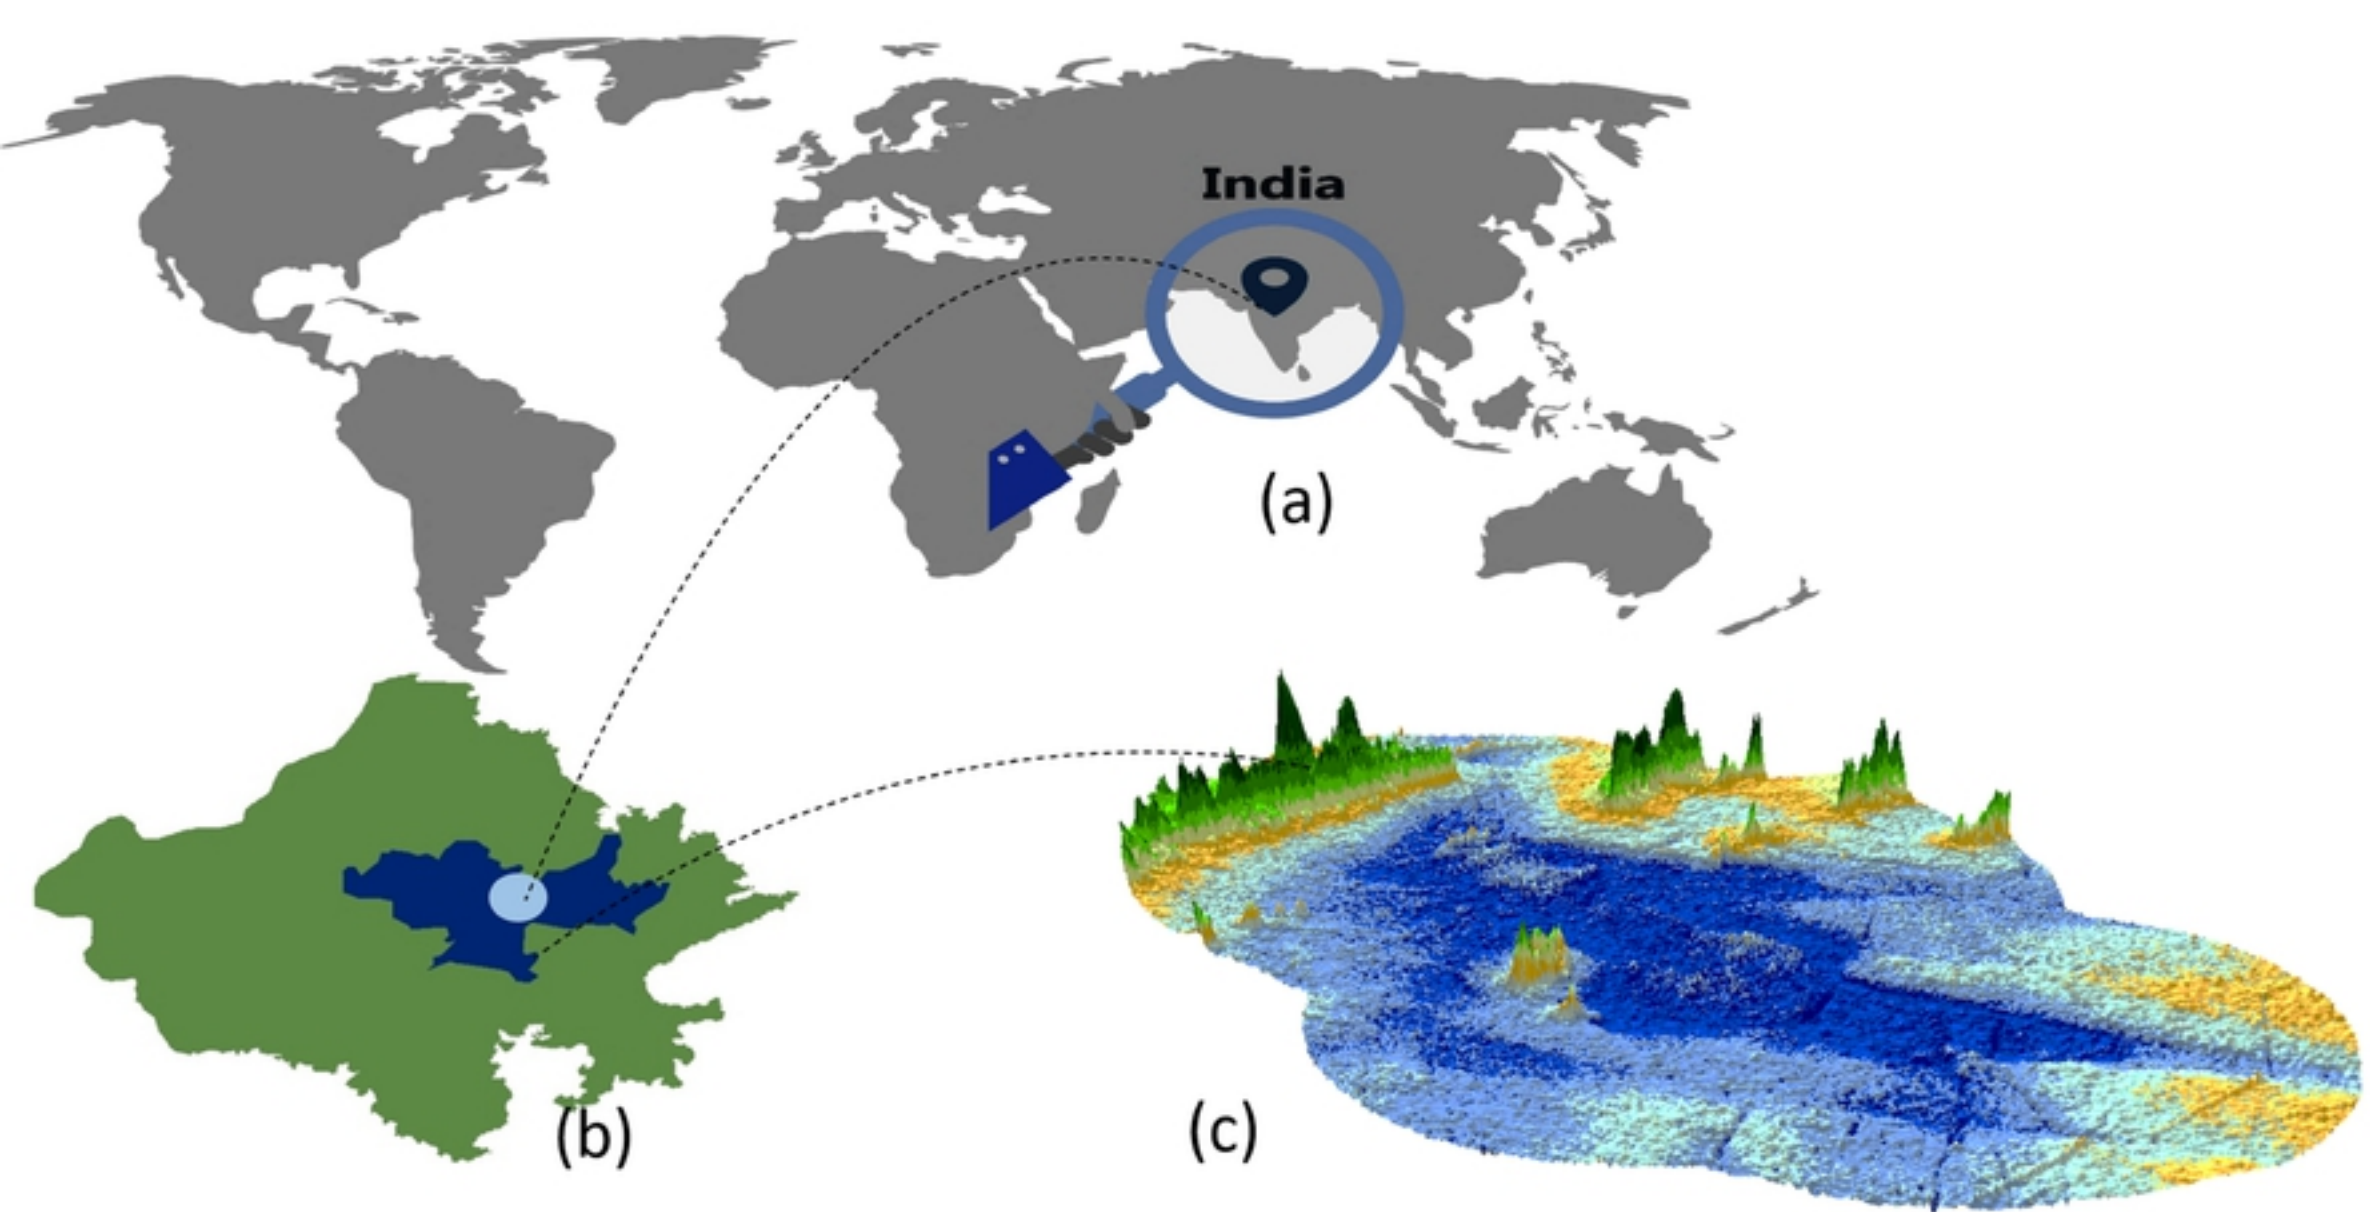

Figure 1

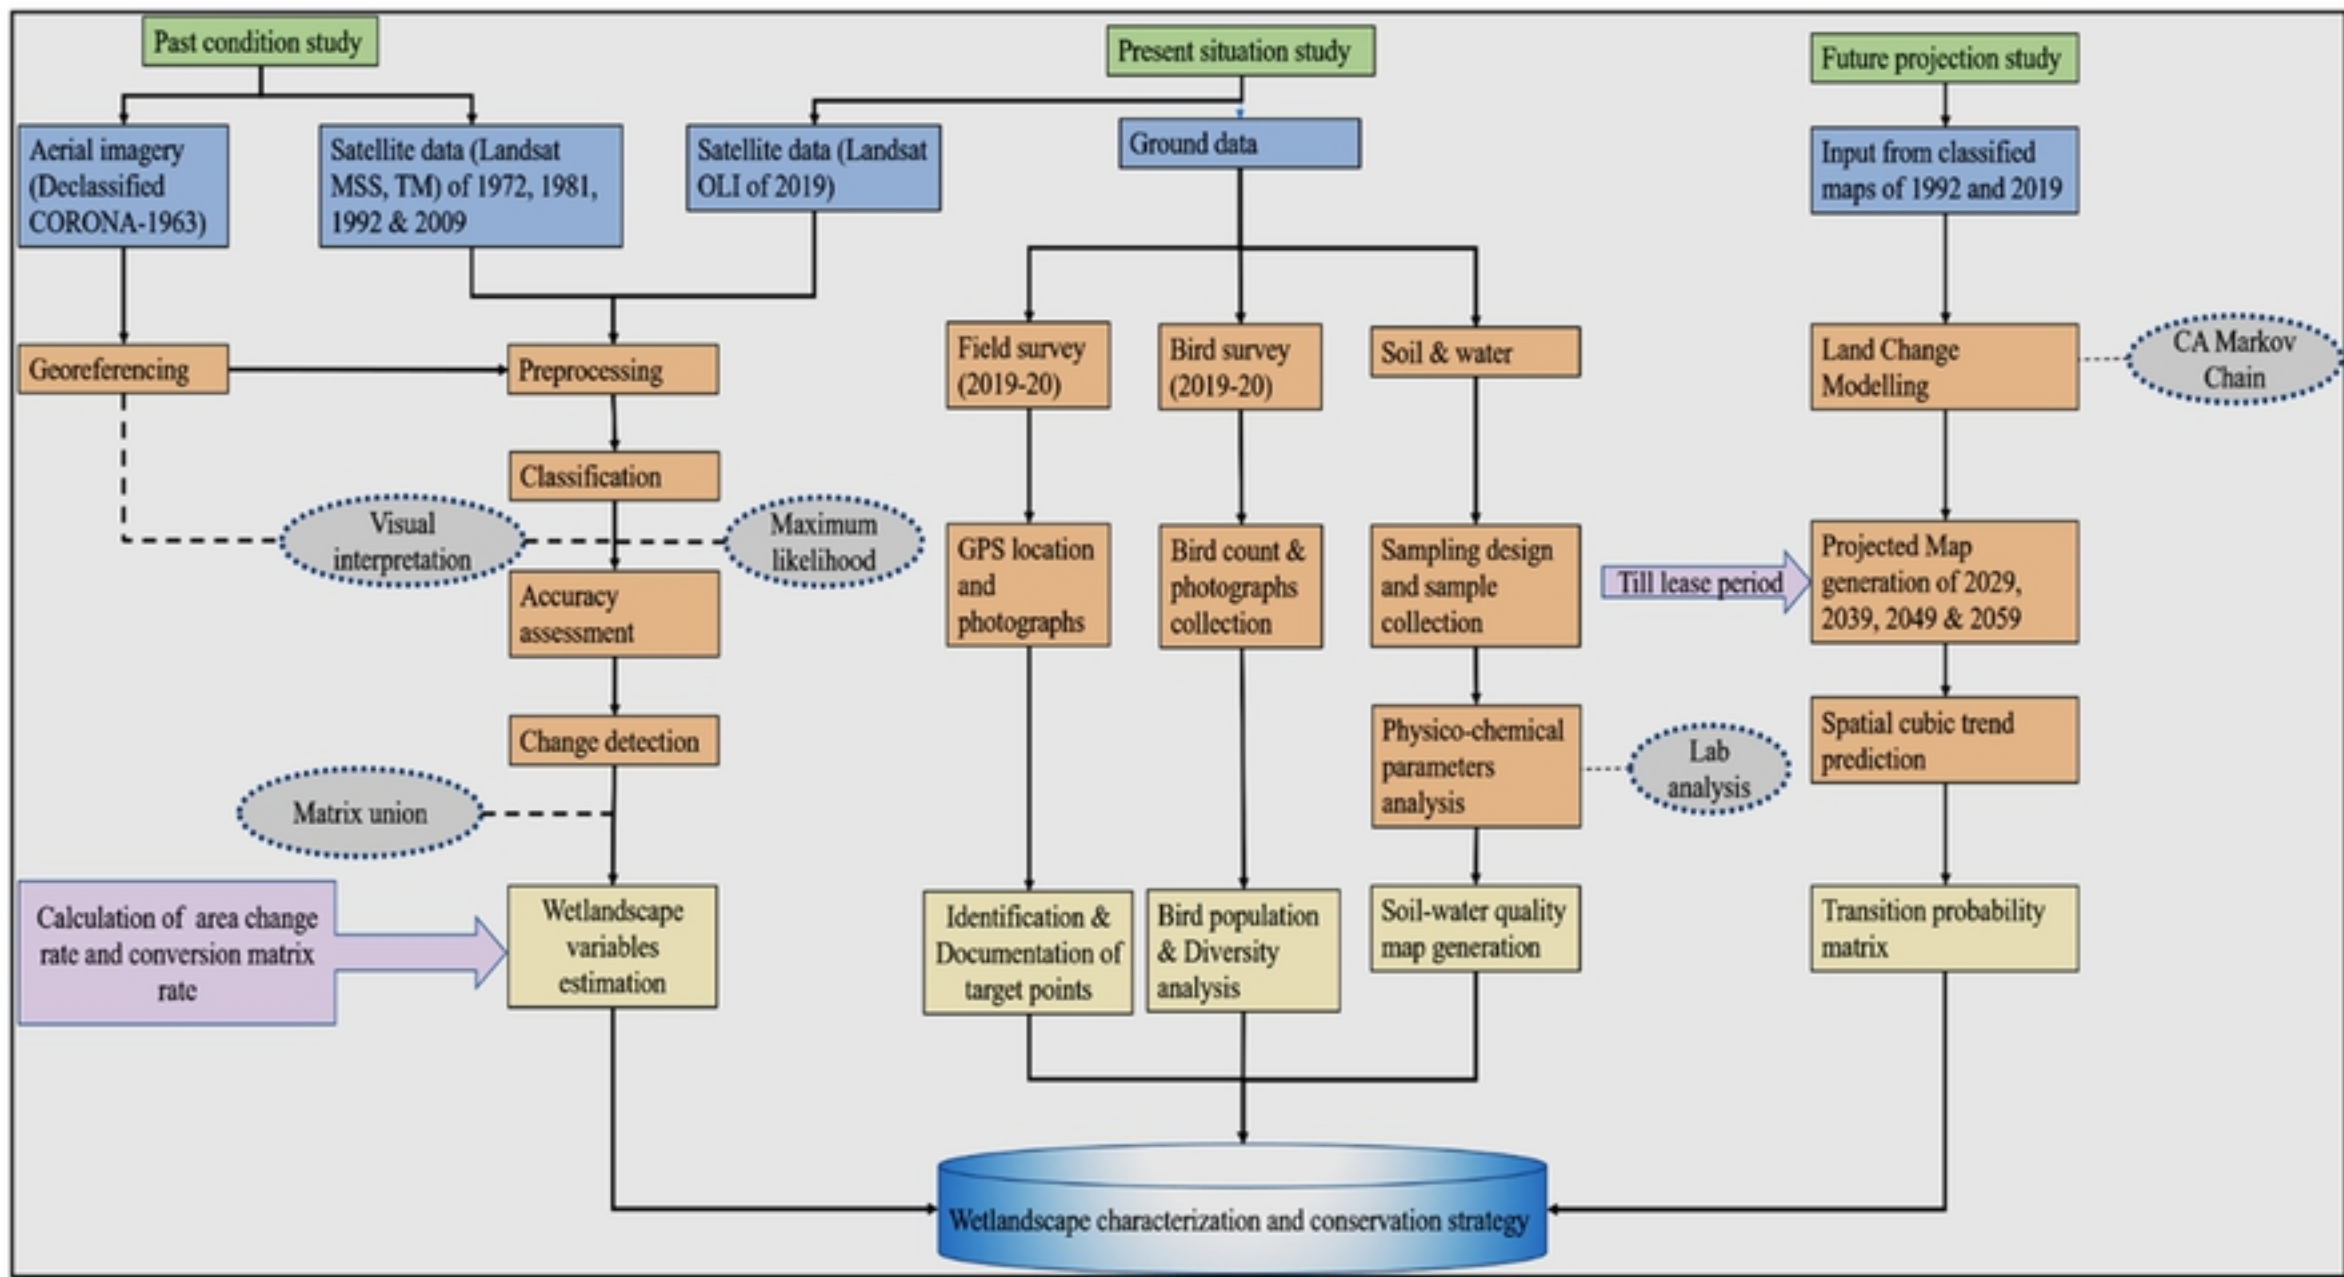

Figure 2

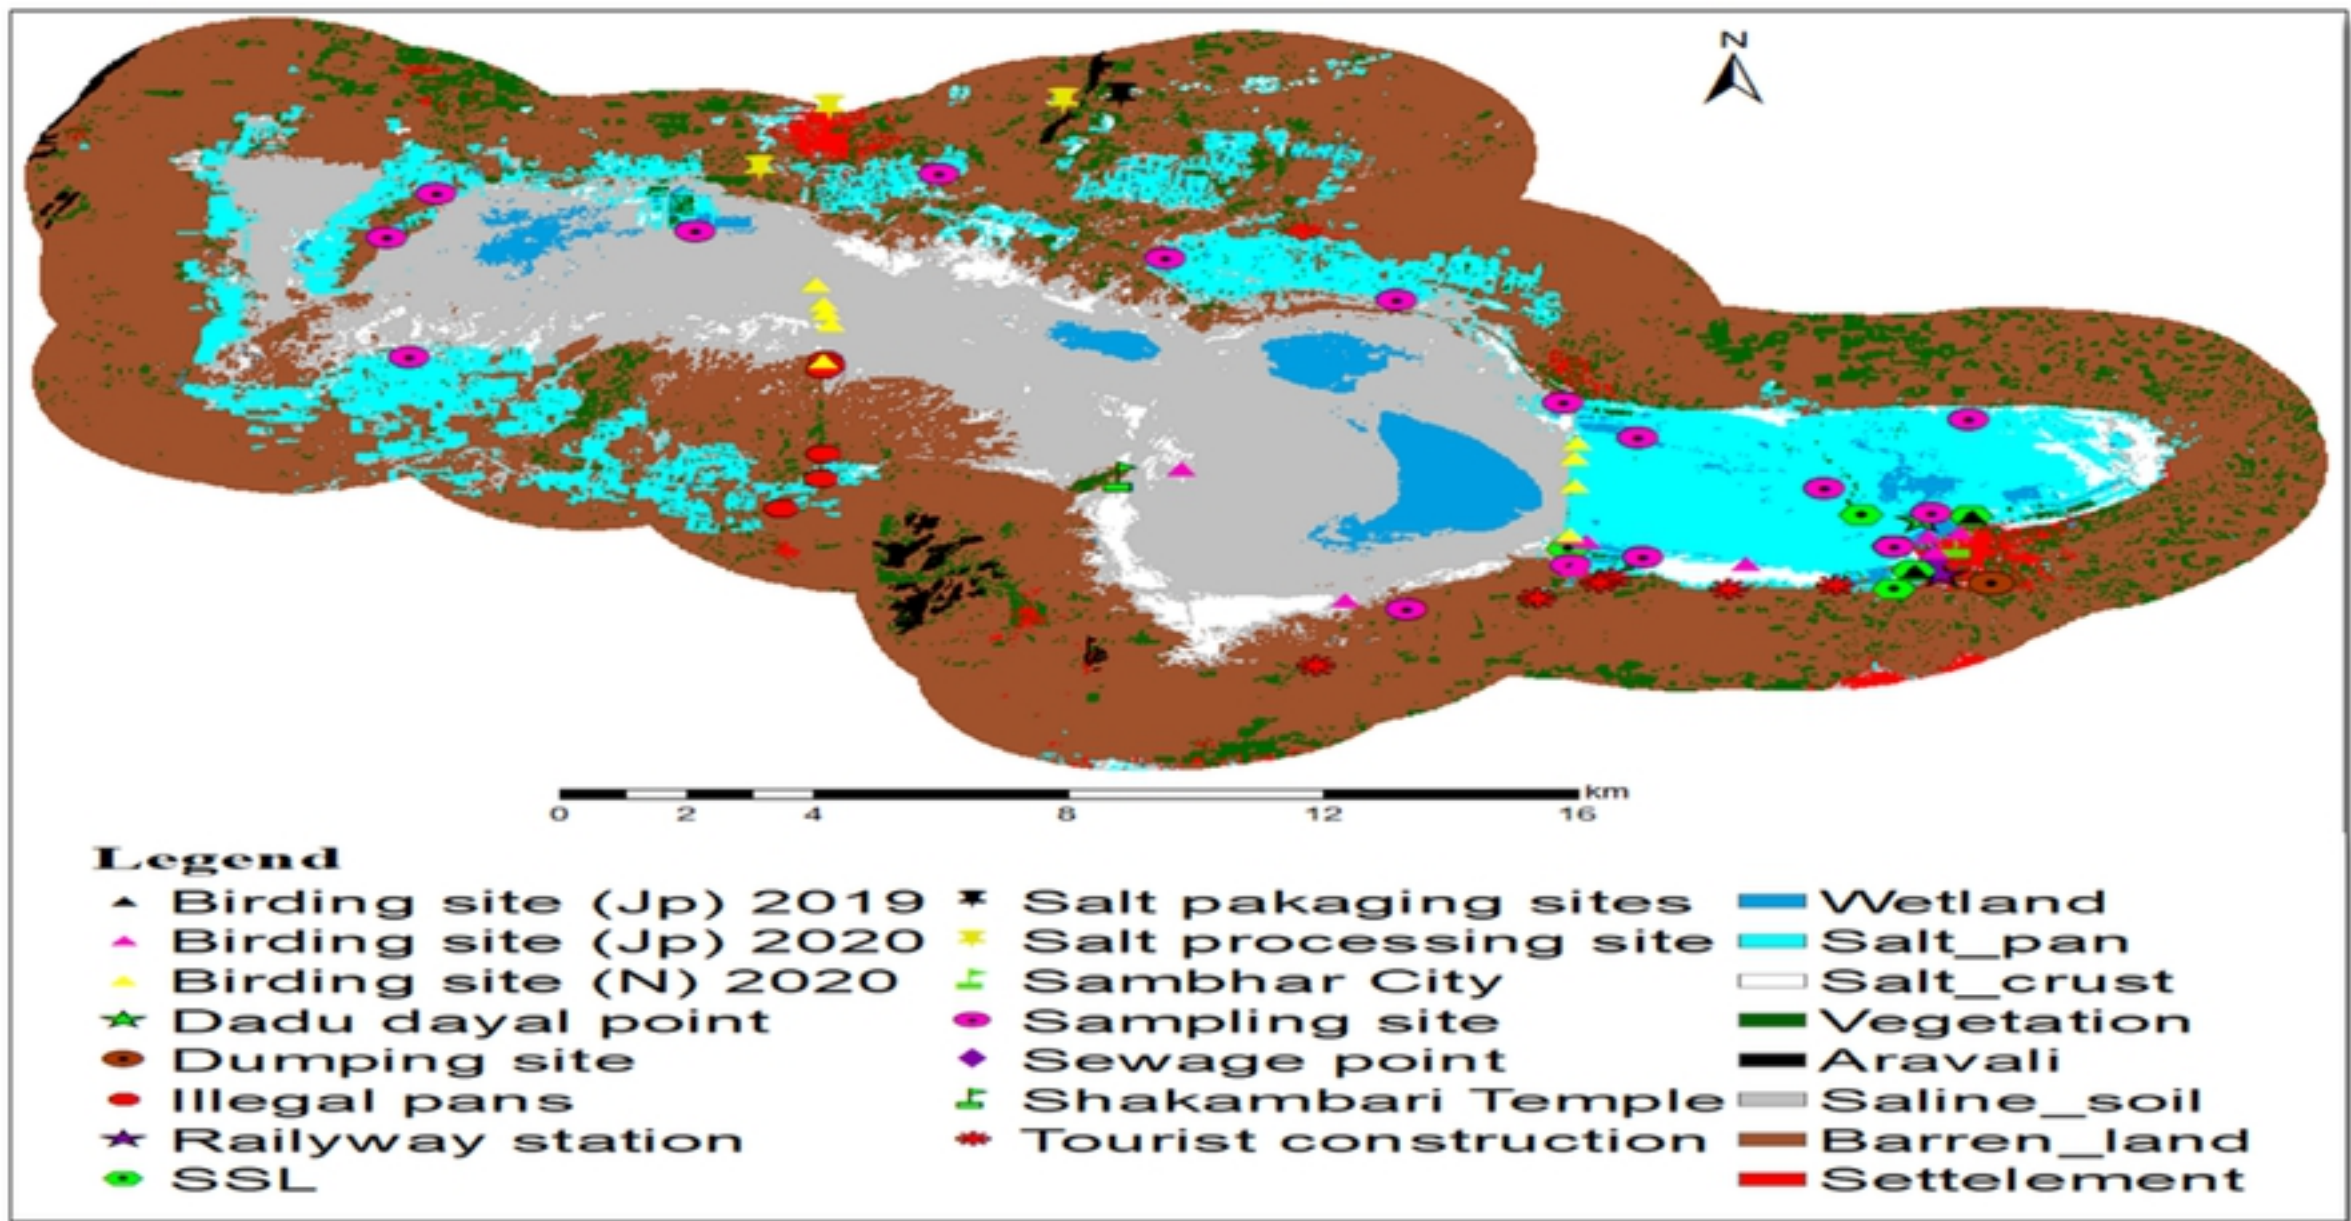

Figure 3

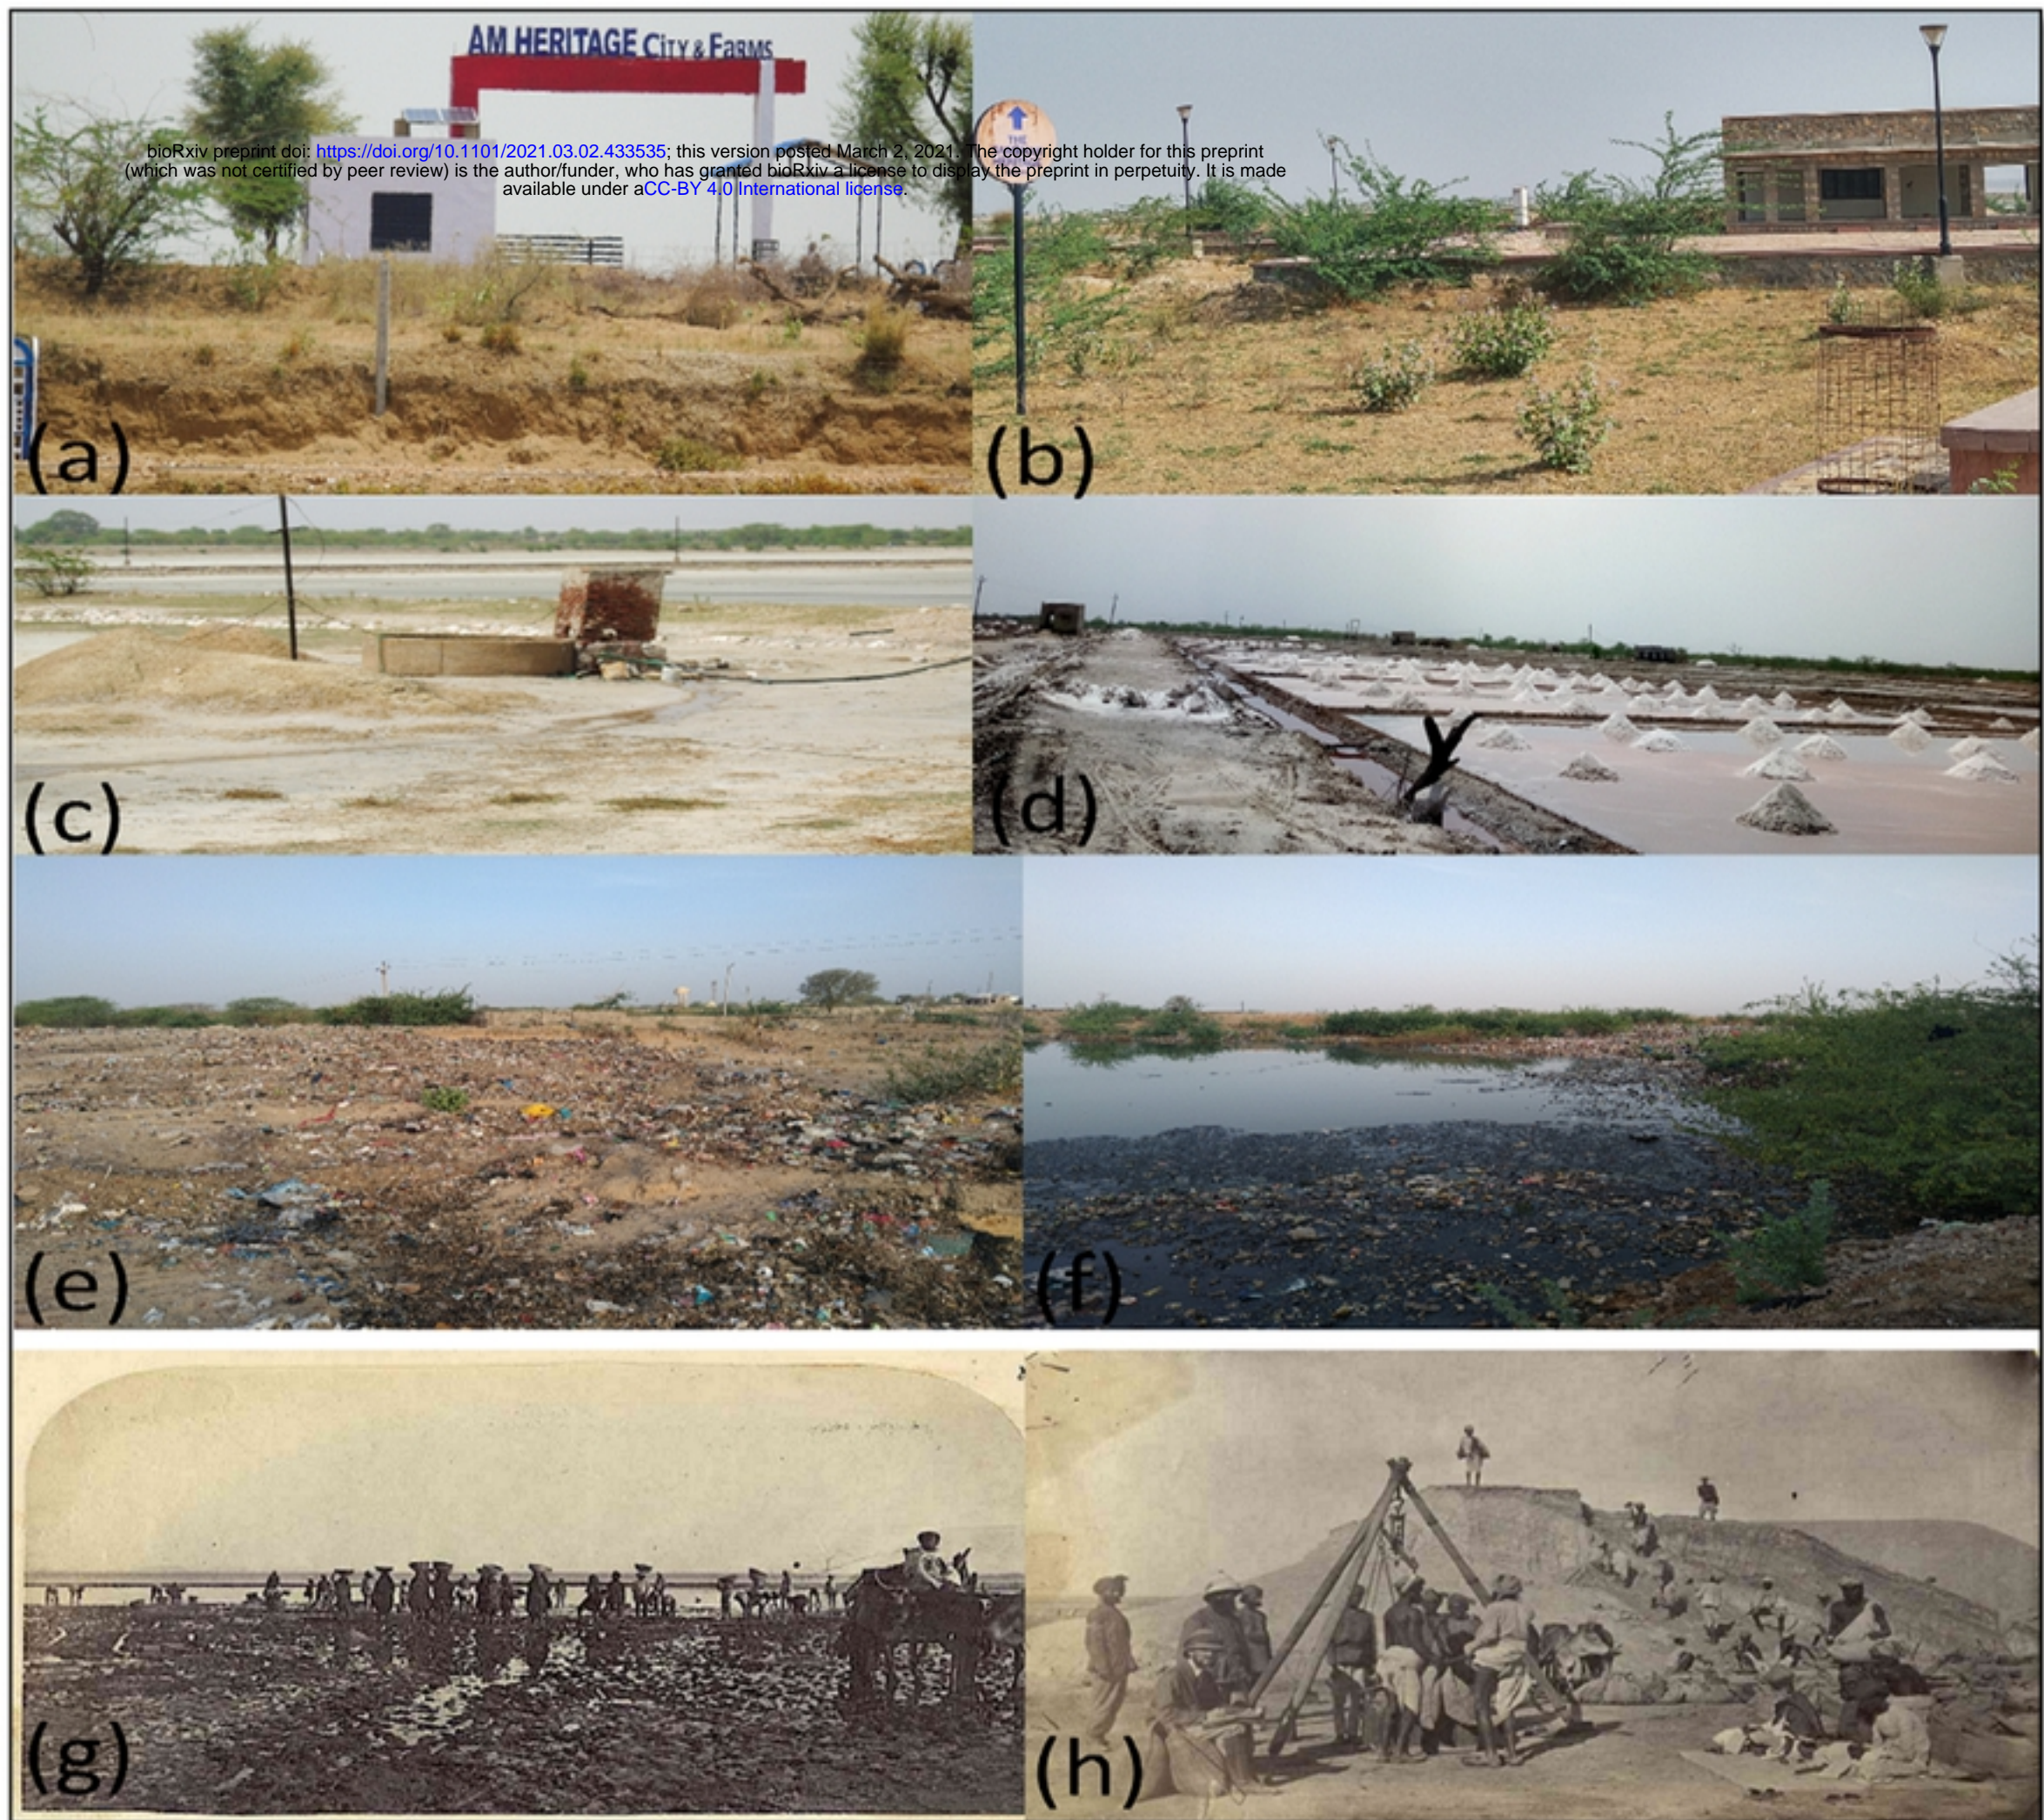

Figure 4

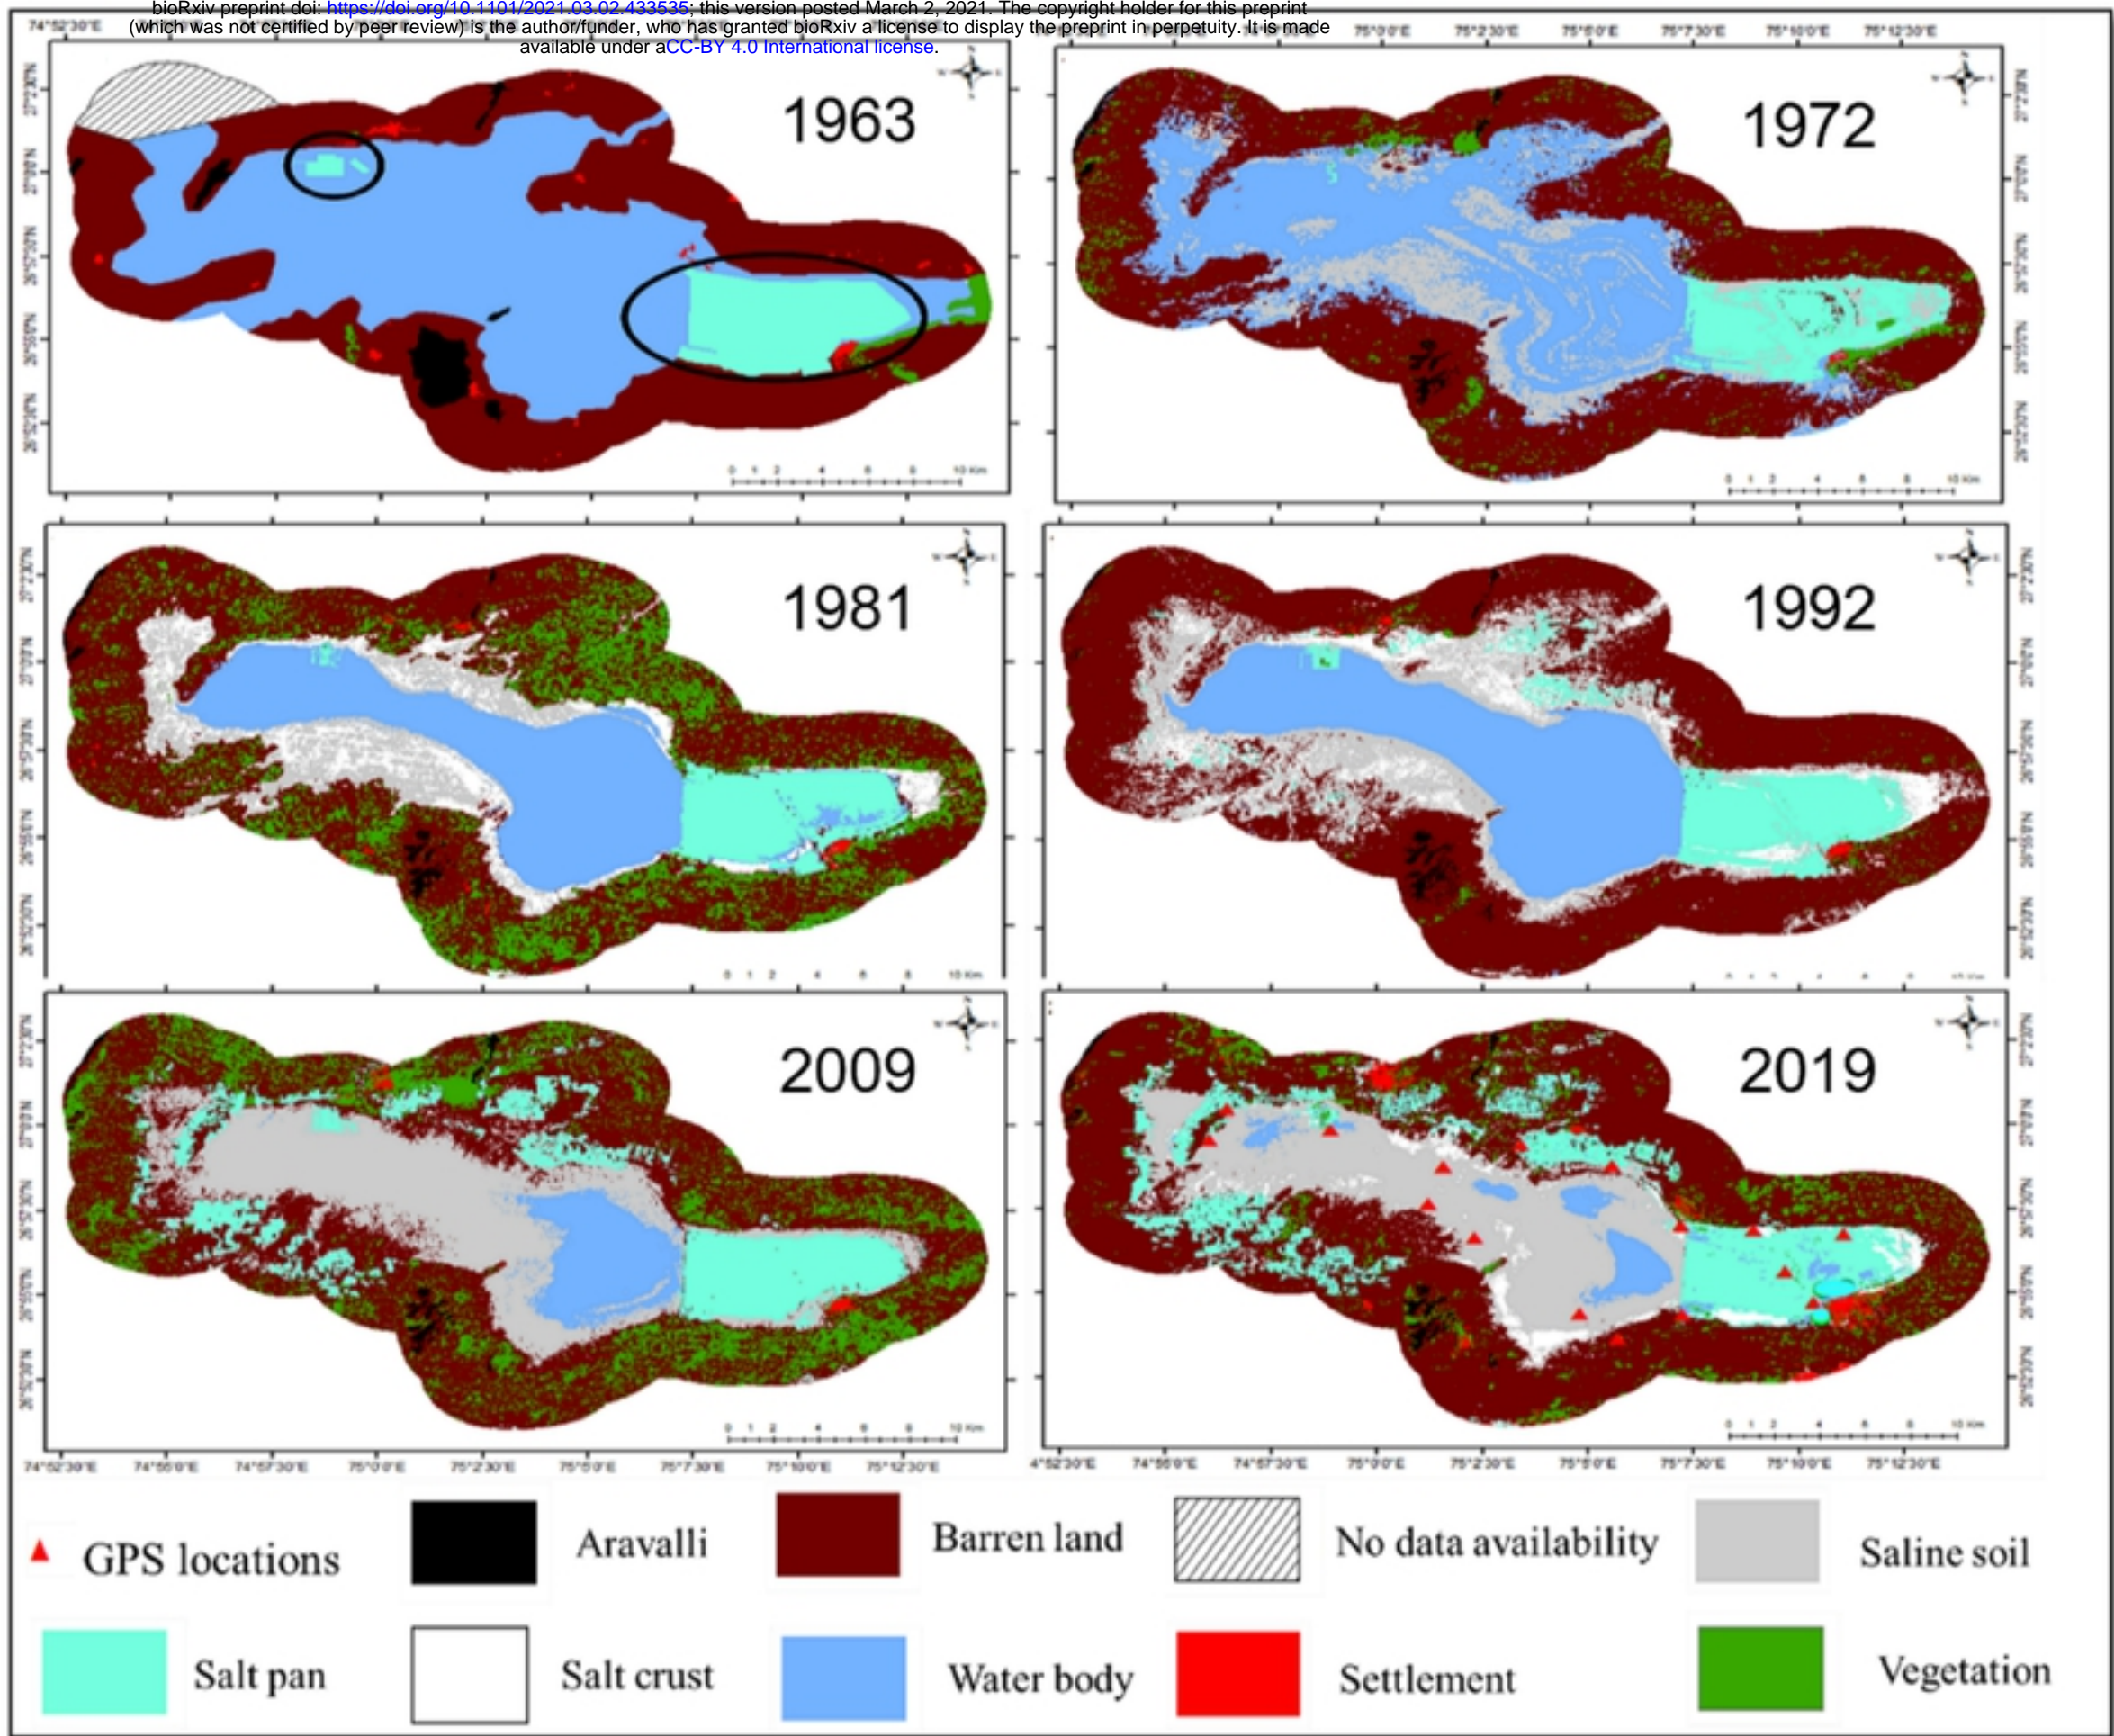

Figure 5

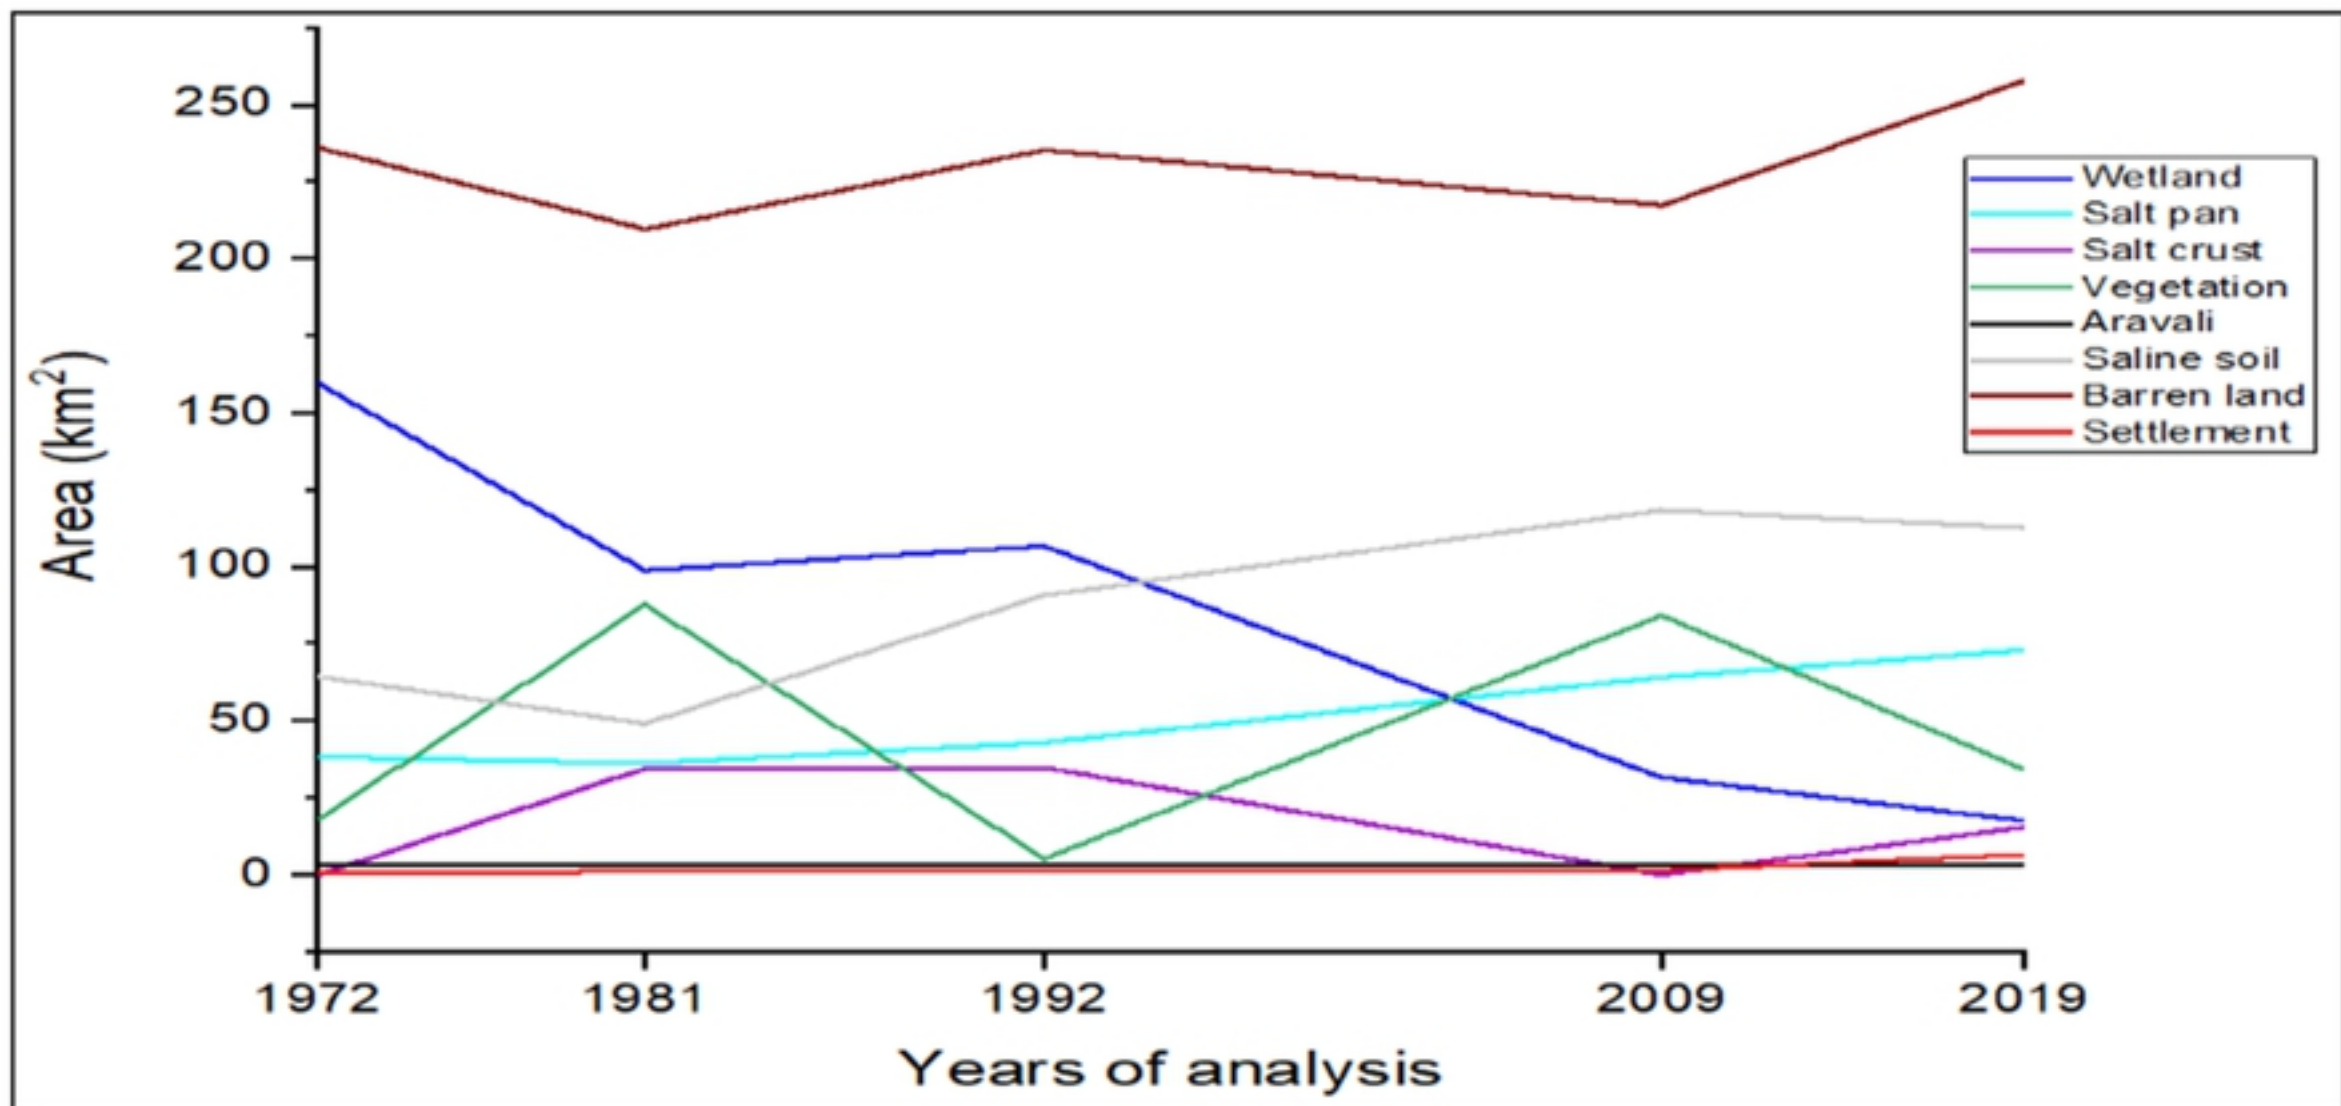

Figure 6

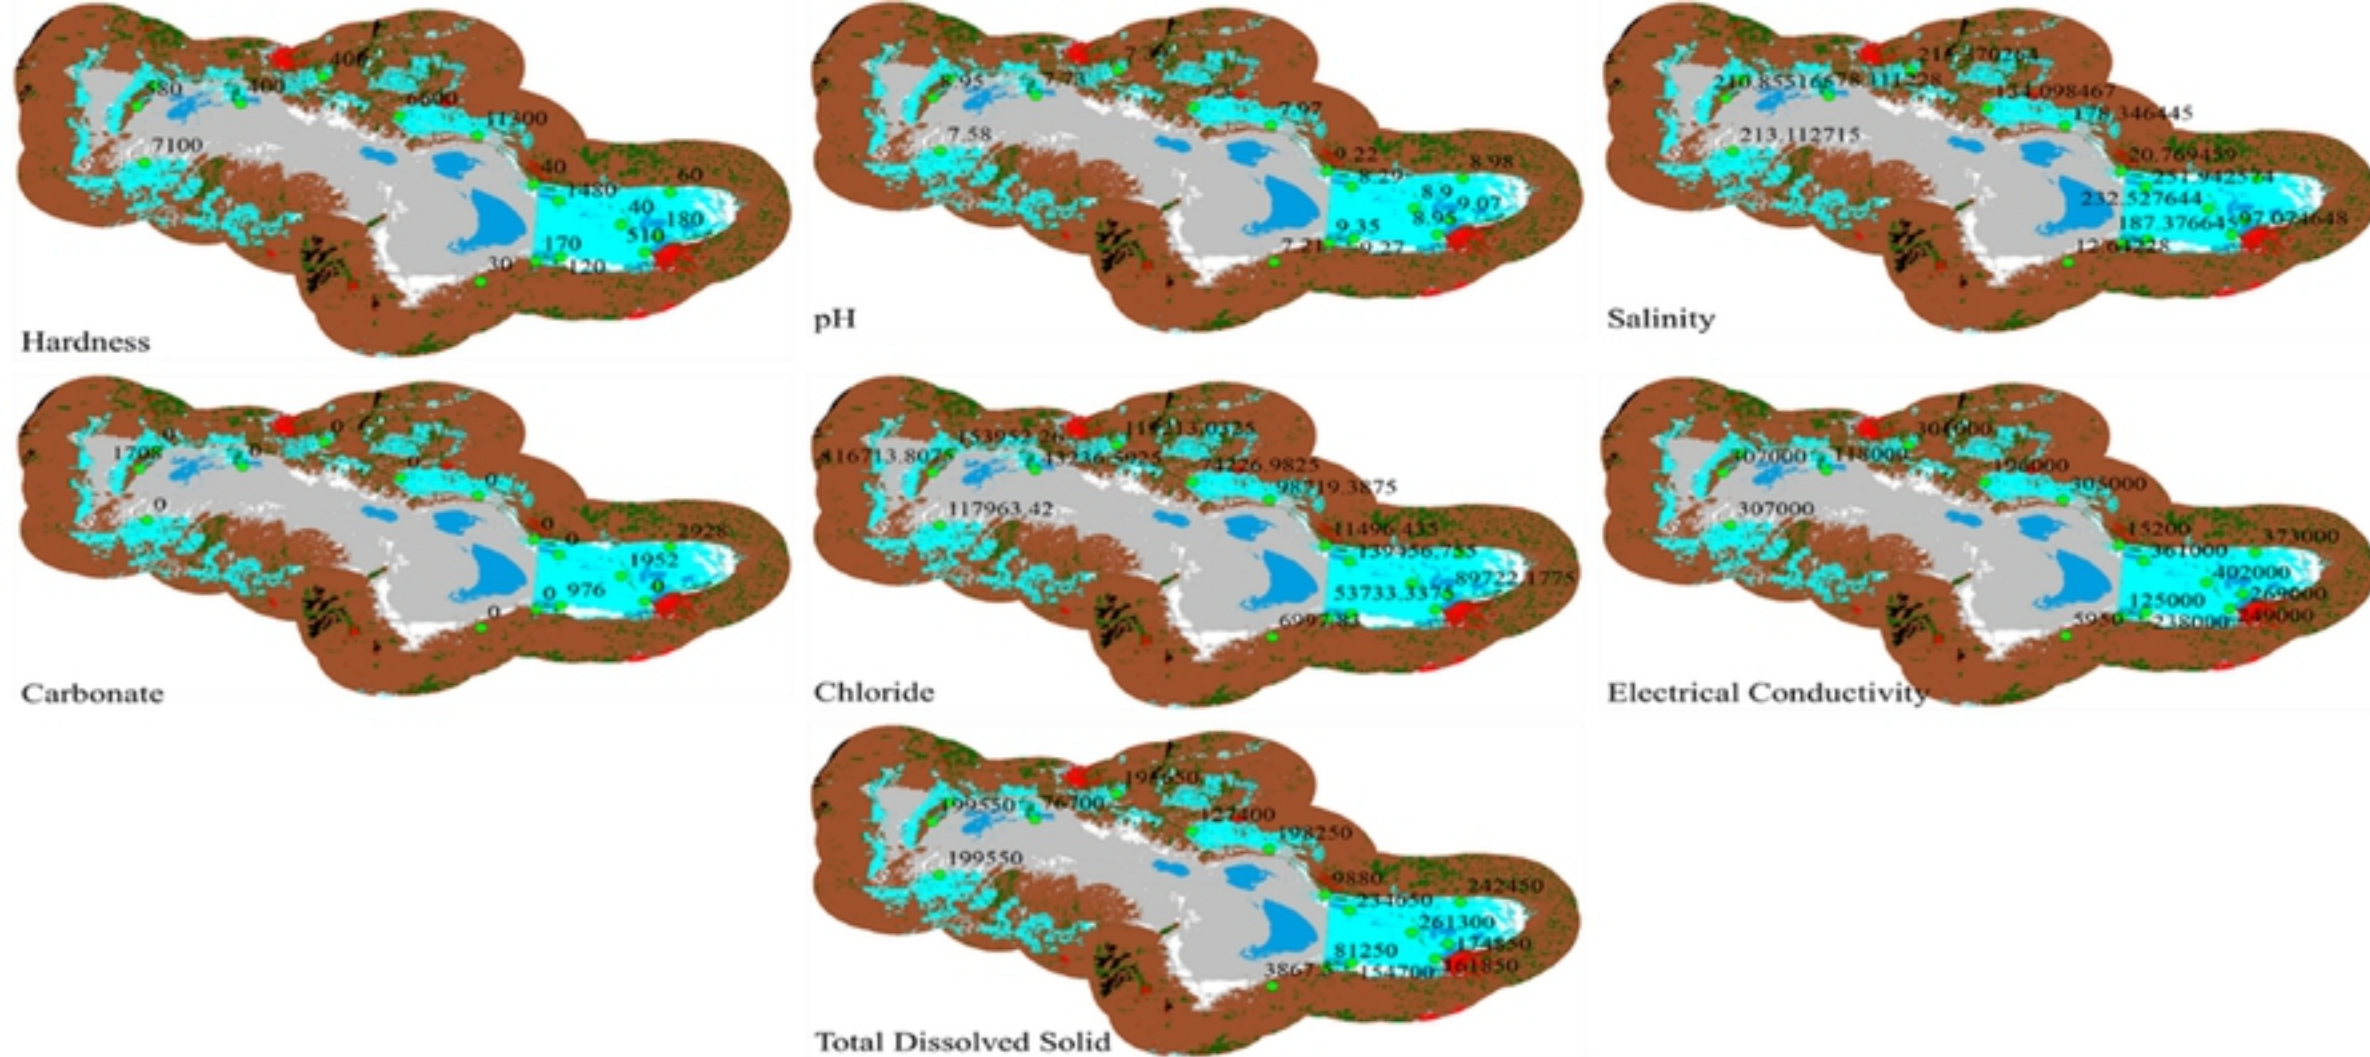

Figure 8

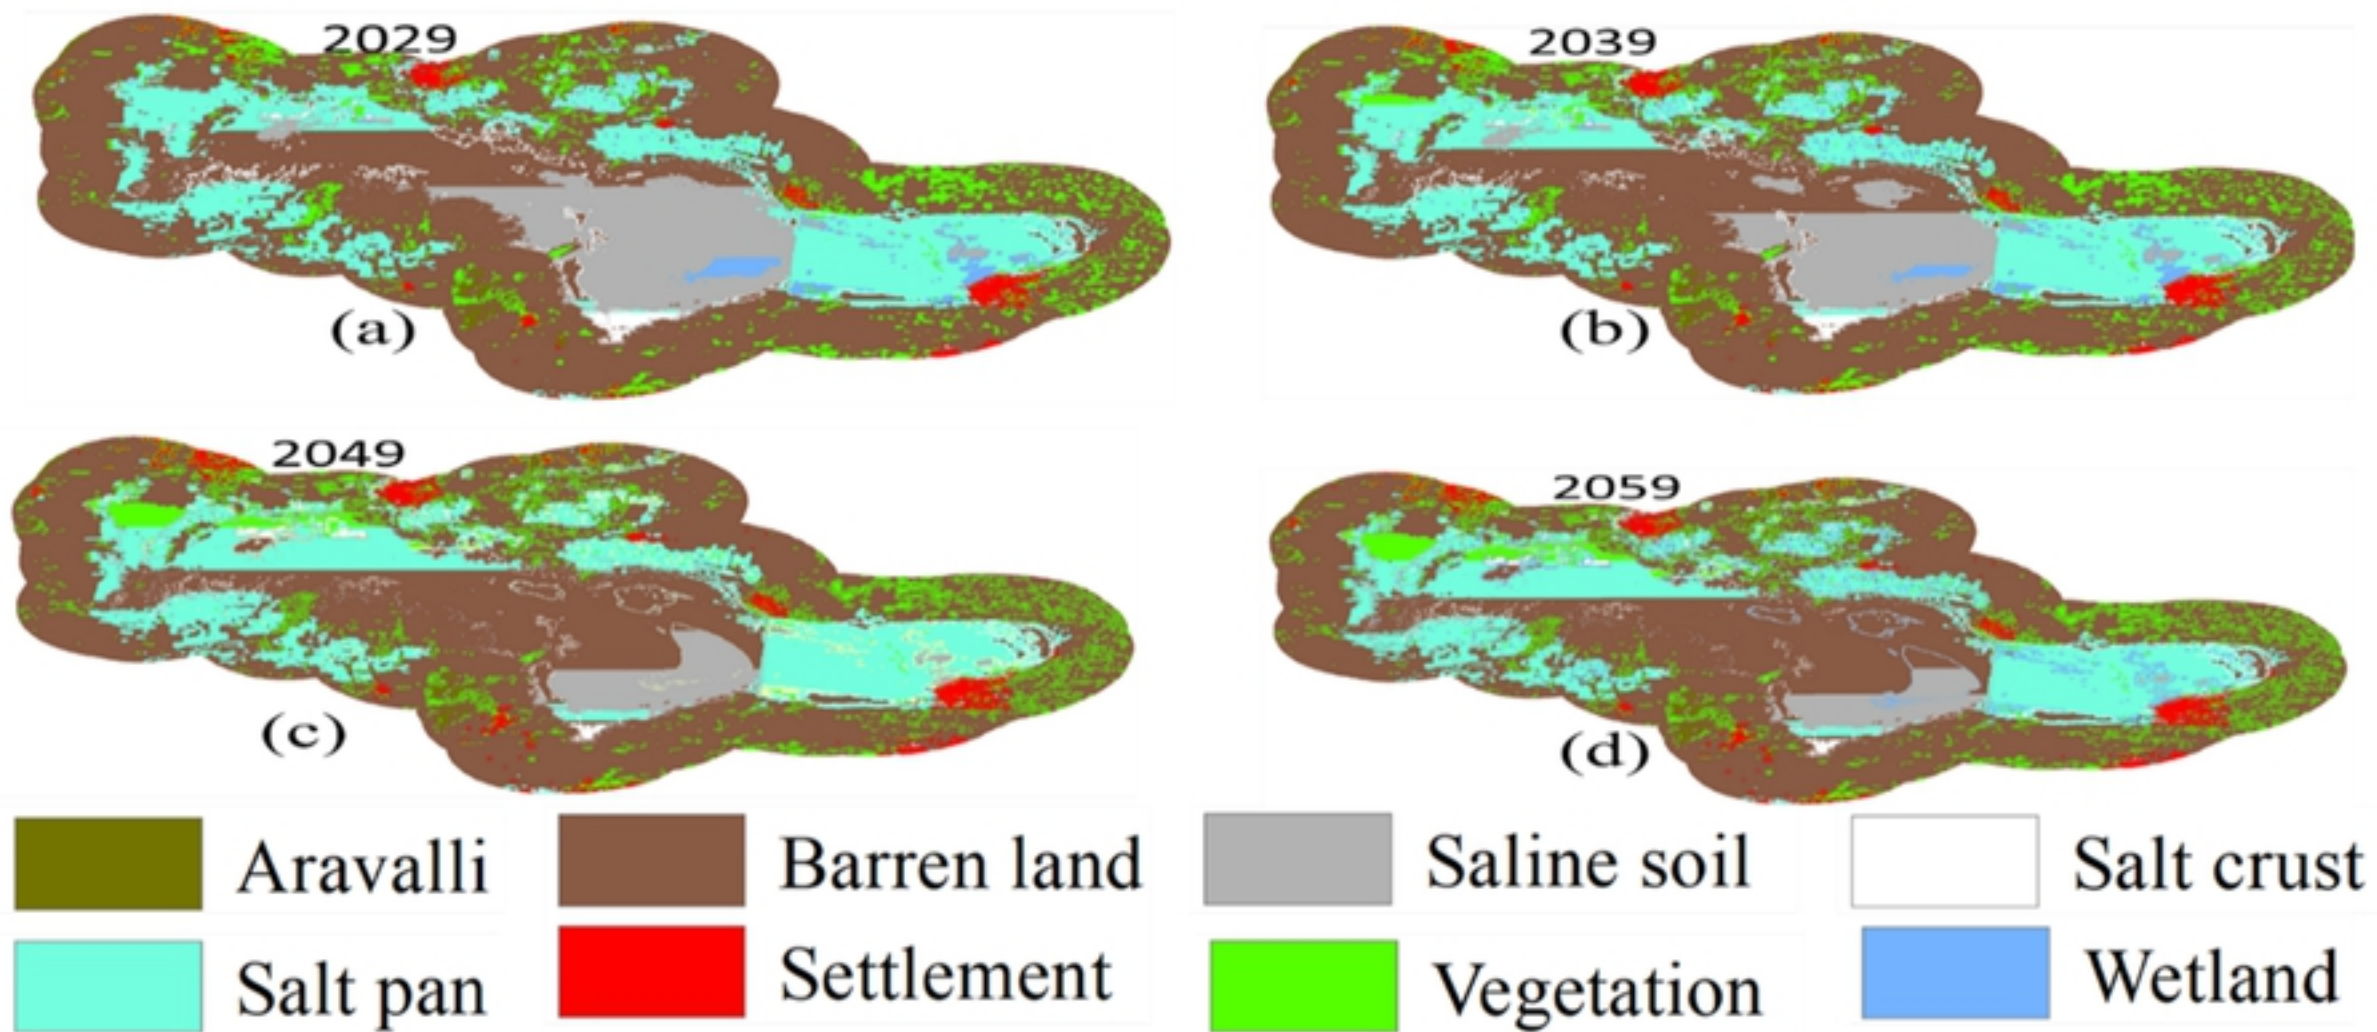

Figure 9



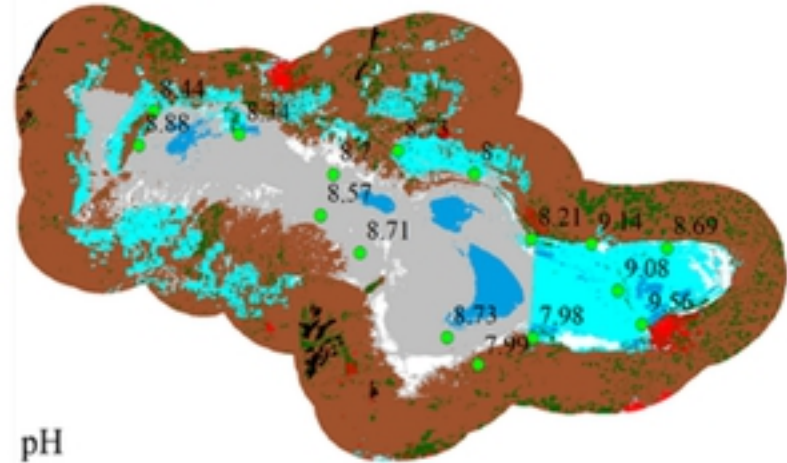

pH

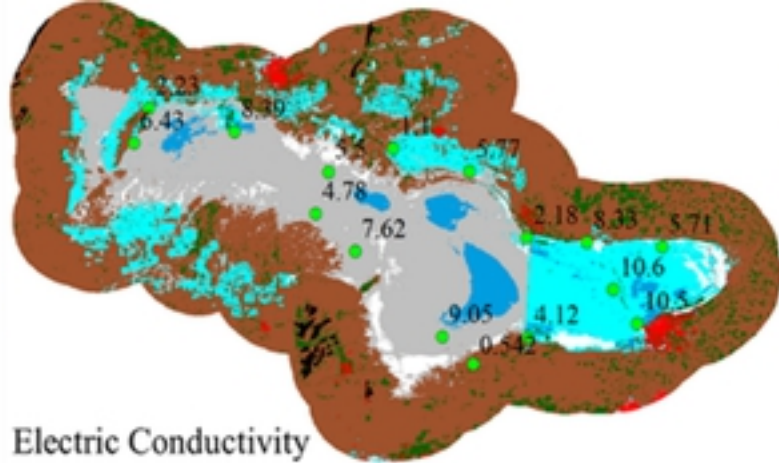

Electric Conductivity

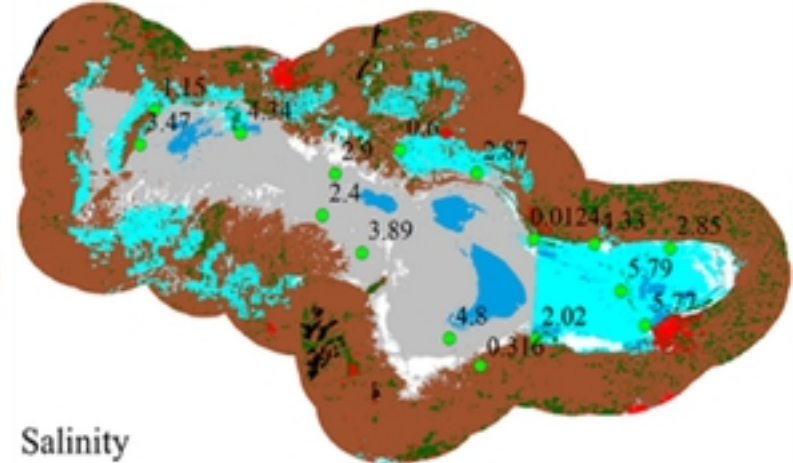

Salinity

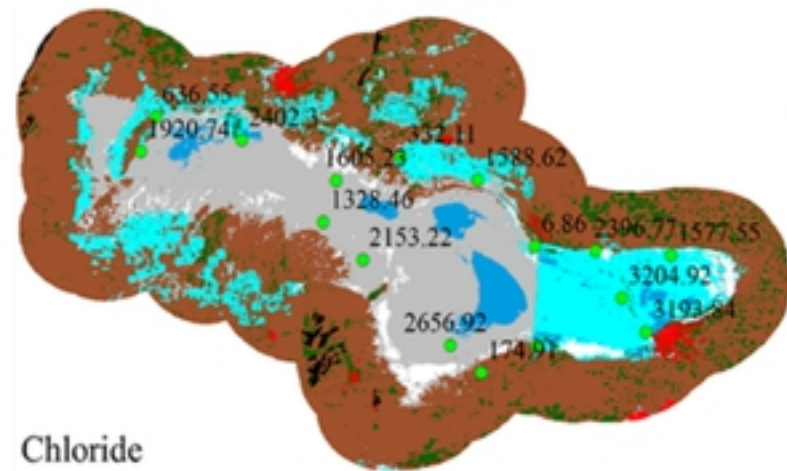

Chloride

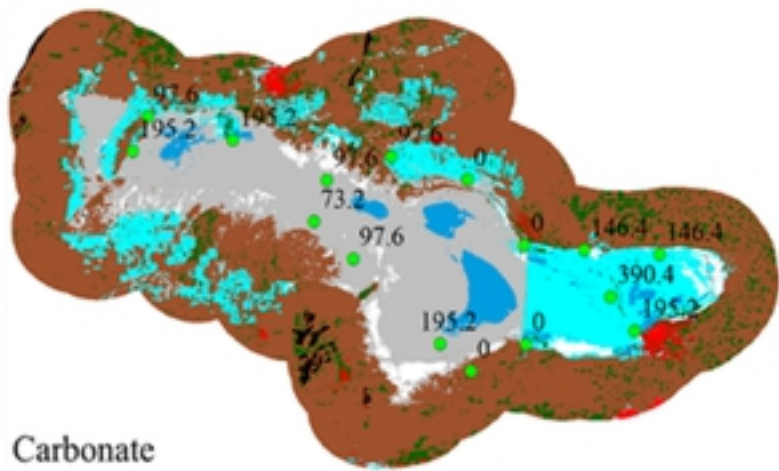

Carbonate

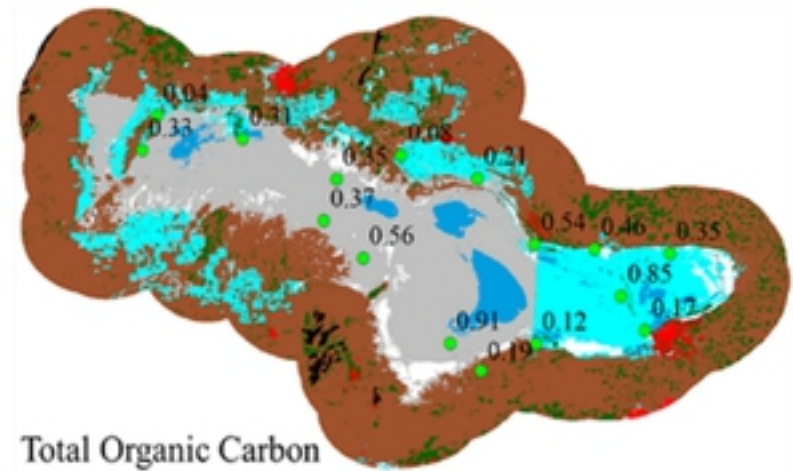

Total Organic Carbon

Figure

Gains and losses between 2029 and 2059

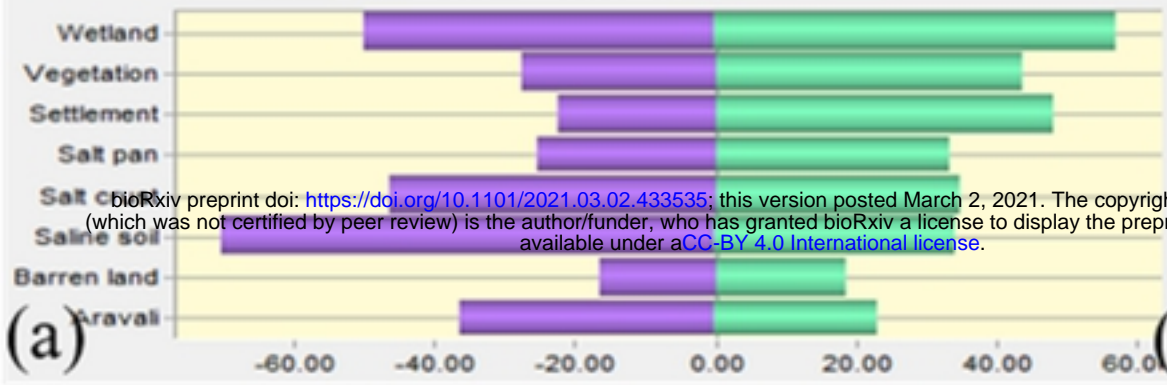

Net Change between 2029 and 2059

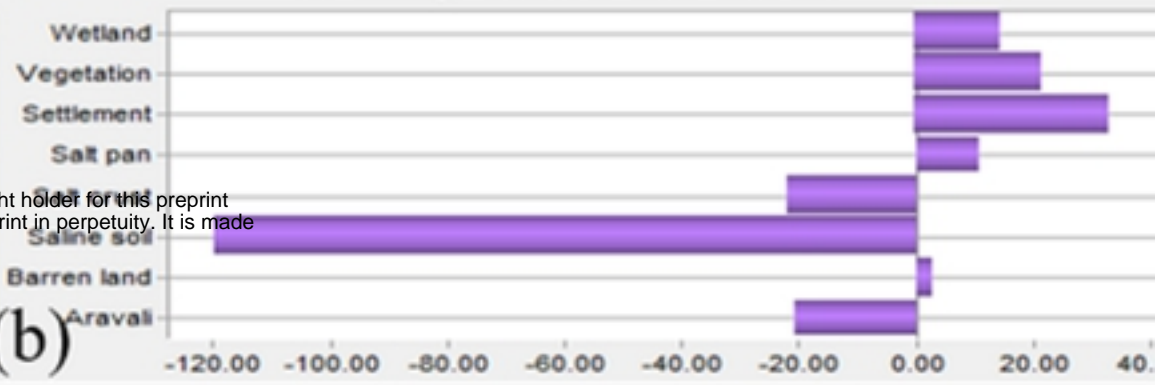

bioRxiv preprint doi: <https://doi.org/10.1101/2021.03.02.433535>; this version posted March 2, 2021. The copyright holder for this preprint (which was not certified by peer review) is the author/funder, who has granted bioRxiv a license to display the preprint in perpetuity. It is made available under aCC-BY 4.0 International license.

Contributions to Net Change in Aravali

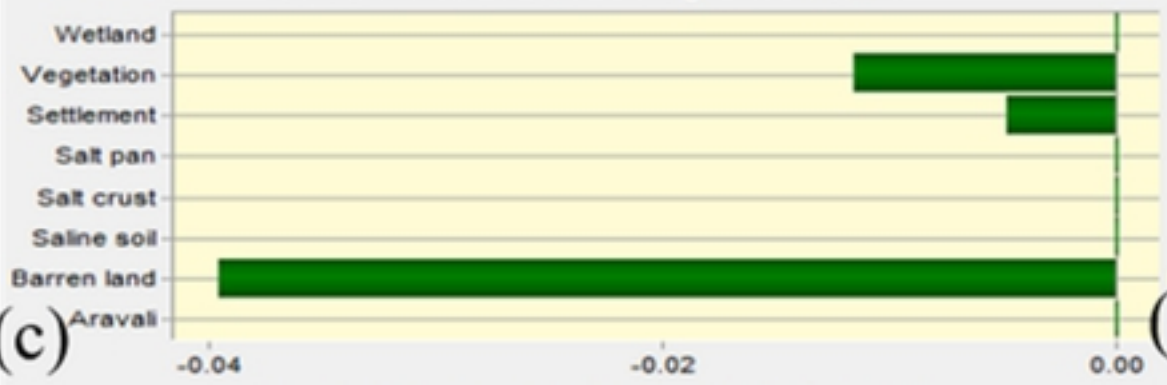

Contributions to Net Change in Barren land

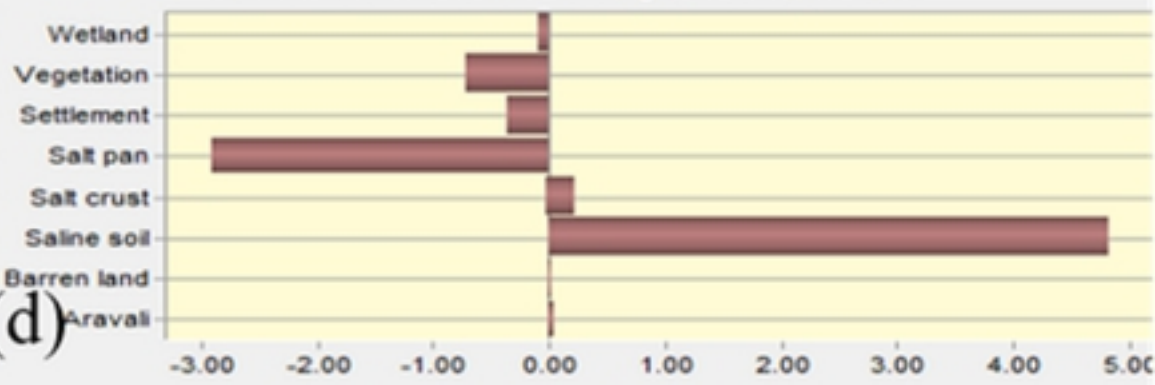

Contributions to Net Change in Saline soil

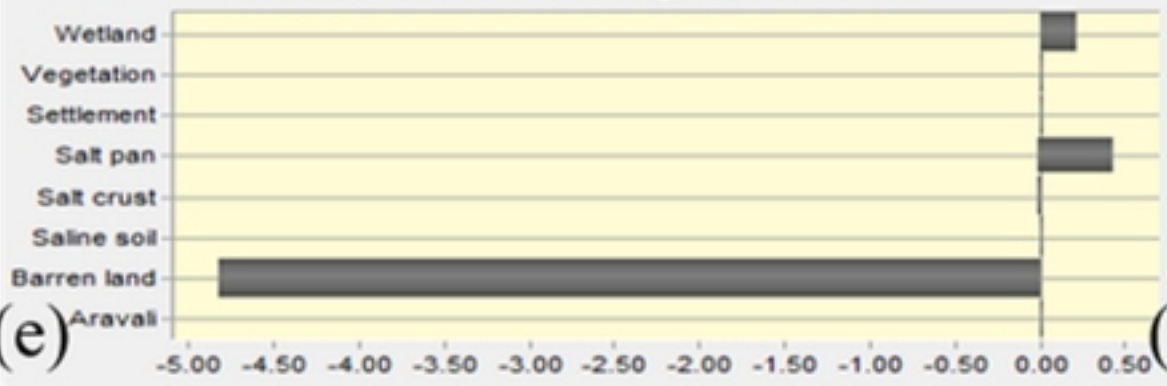

Contributions to Net Change in Salt crust

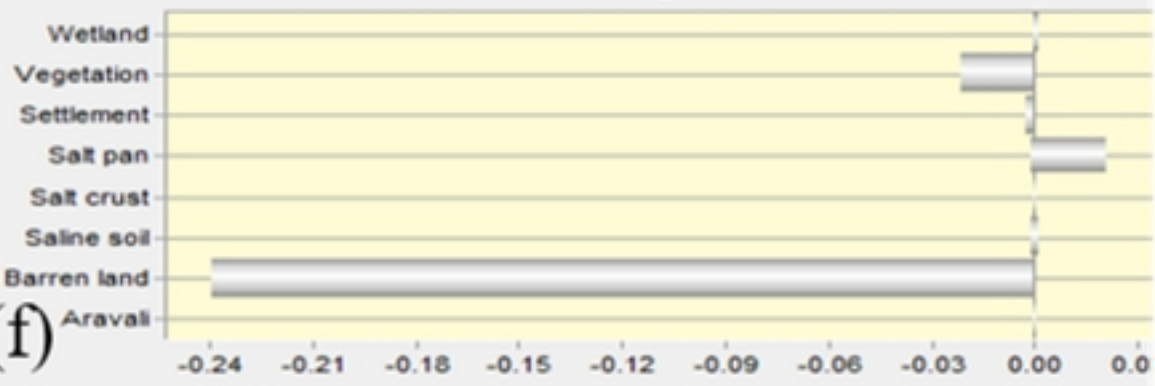

Contributions to Net Change in Salt pan

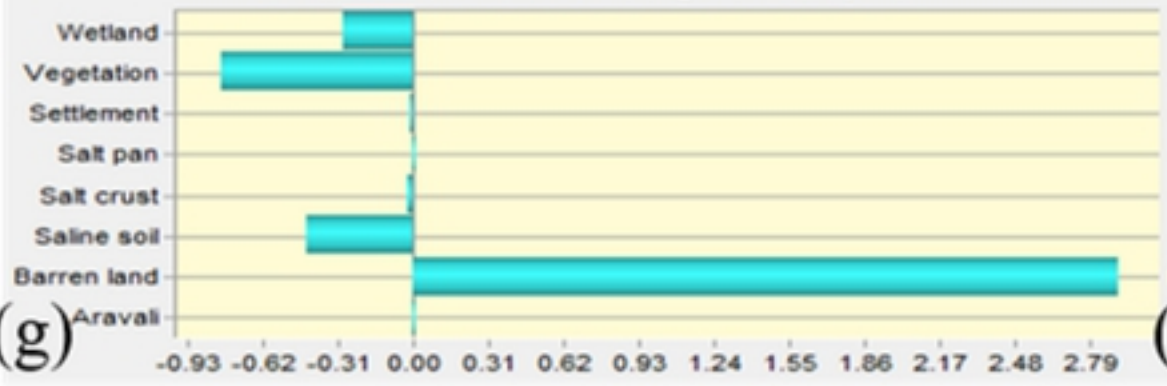

Contributions to Net Change in Settlement

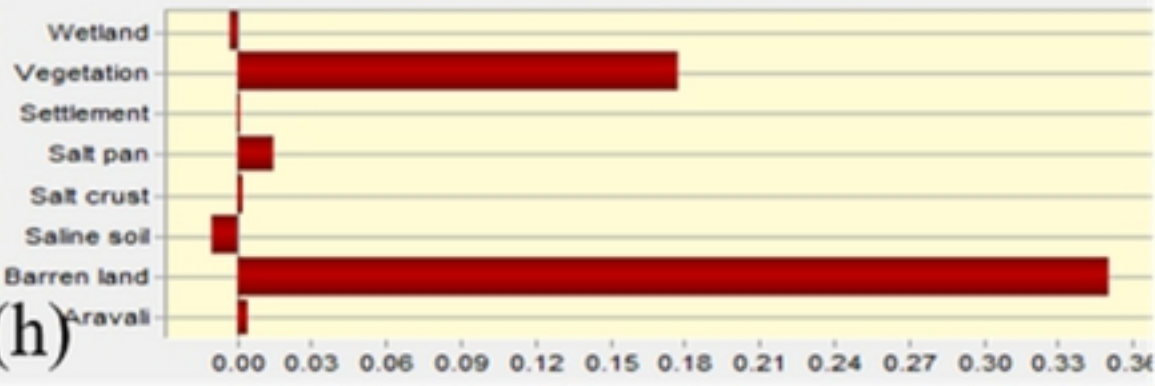

Contributions to Net Change in Vegetation

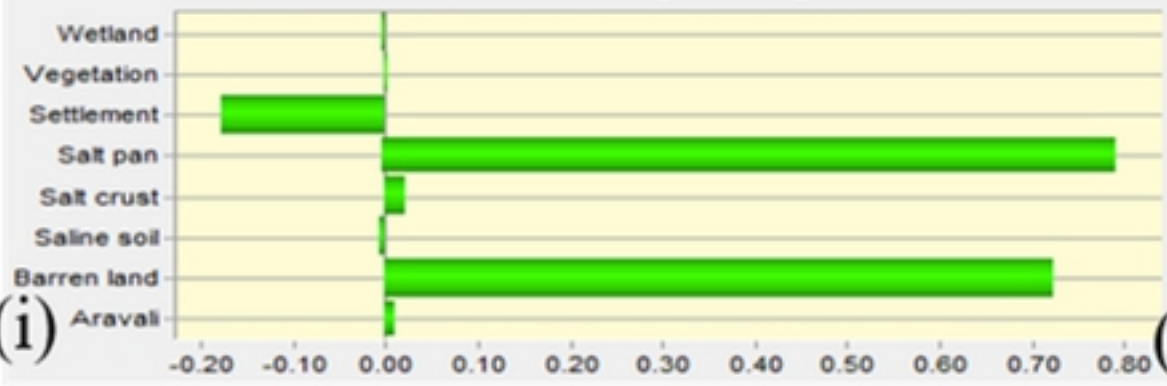

Contributions to Net Change in Wetland

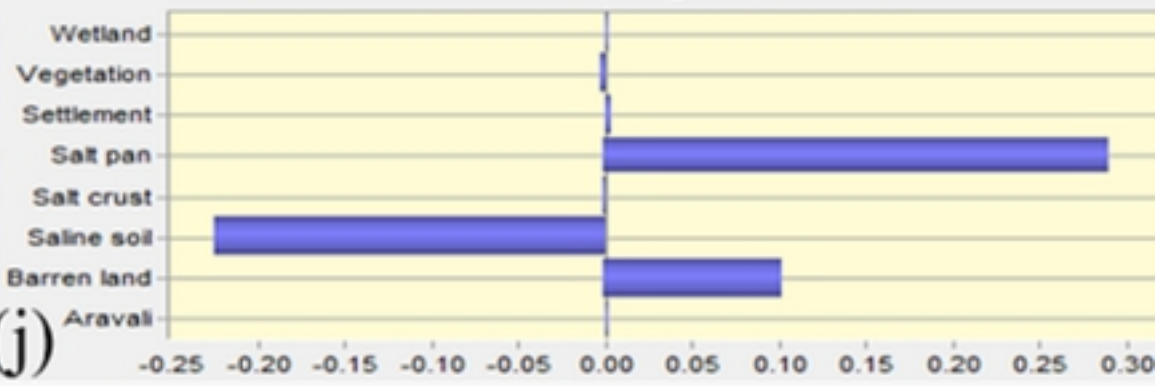

Figure

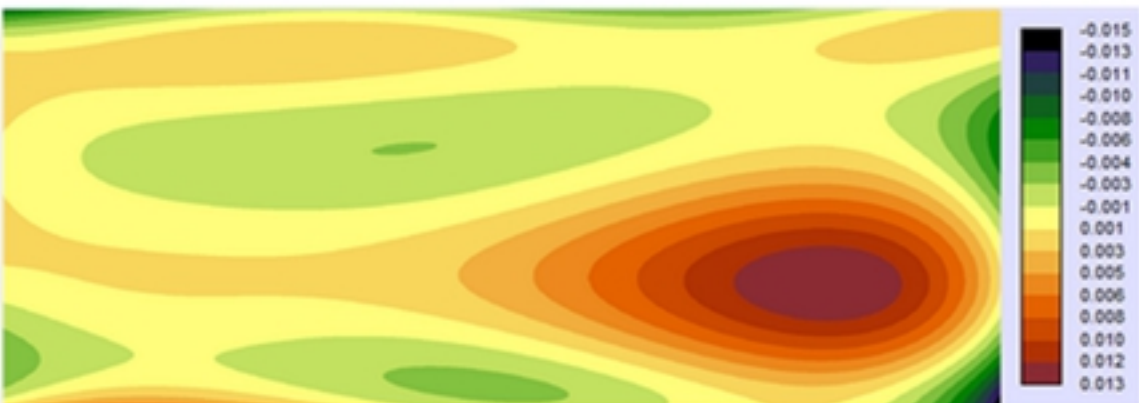

Cubic trend for conversion of wetland to salt pan

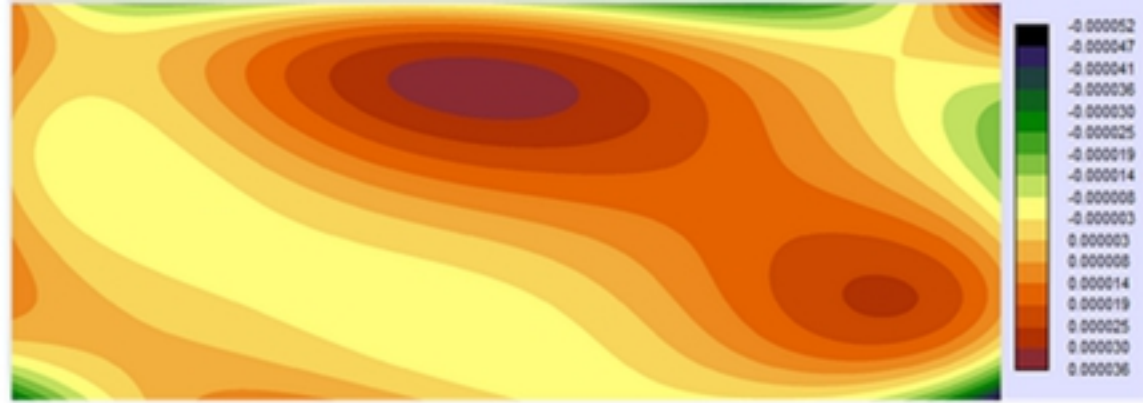

Cubic trend for conversion wetland to settlement

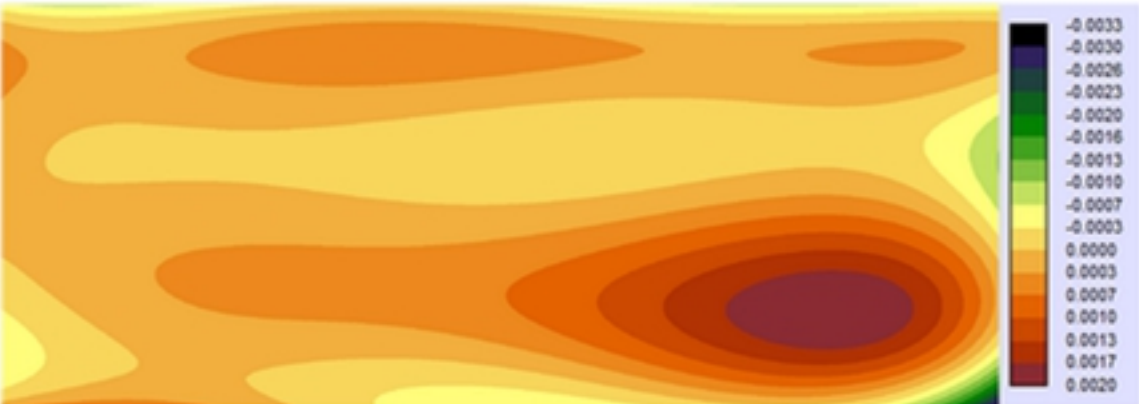

Cubic trend for conversion of wetland to barren land

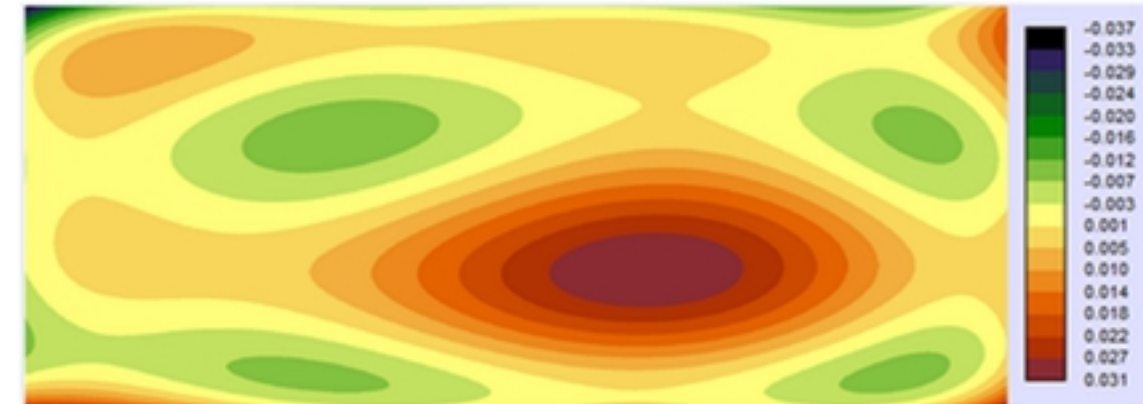

Cubic trend for conversion of wetland to saline soil

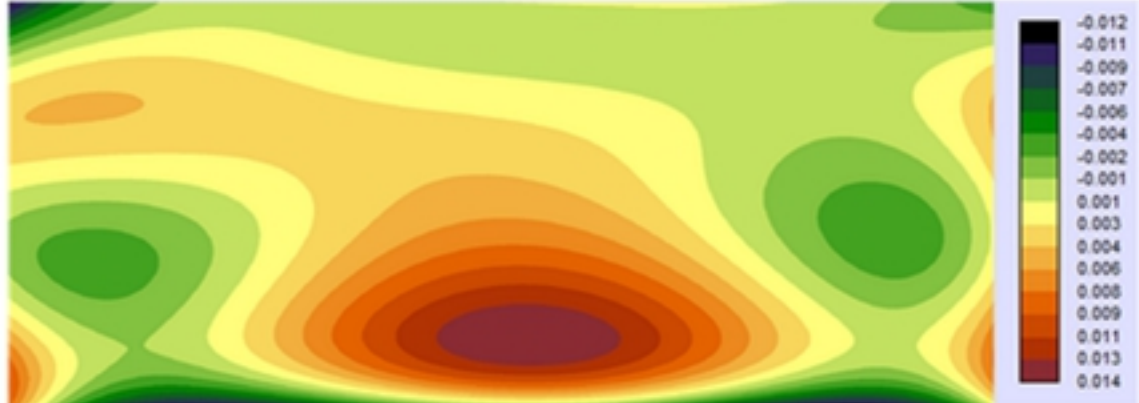

Cubic trend for conversion of salt crust to salt pan

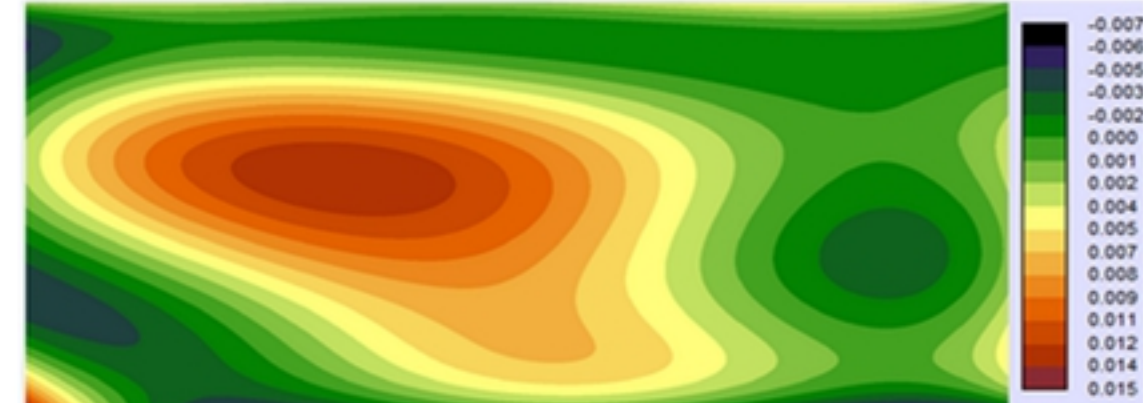

Cubic trend for conversion of salt crust to barren land

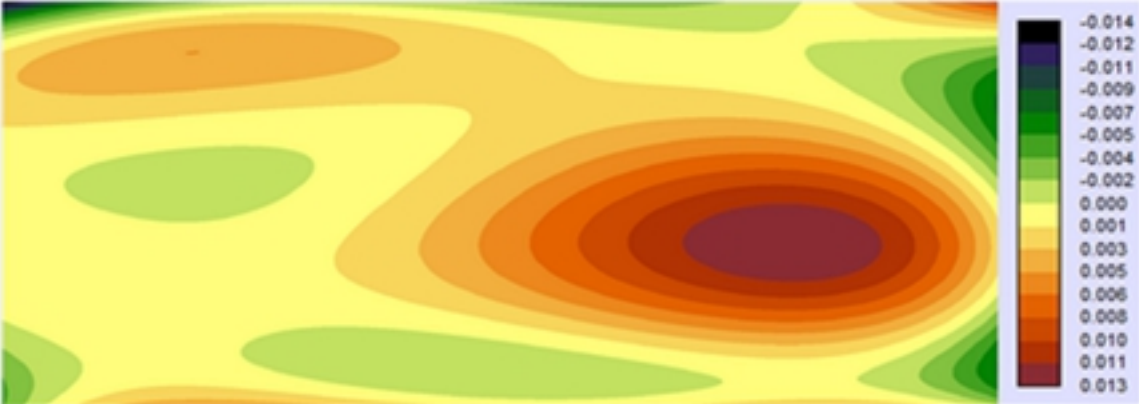

Cubic trend for conversion of saline soil to salt pan

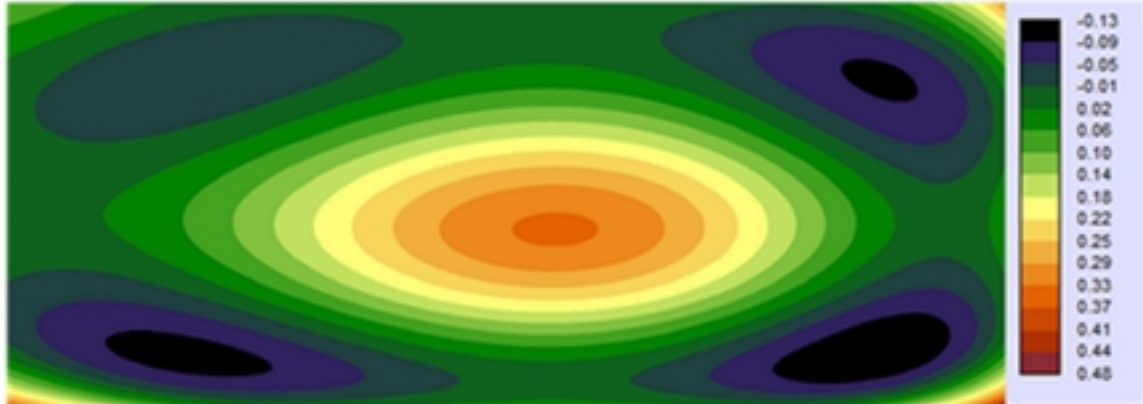

Cubic trend for conversion of saline soil to barren land

Figure
